# Supplementary material for: Breaking antimicrobial resistance by disrupting extracytoplasmic protein folding
Source: eLife. 2022 Jan 13;11:e57974. doi: 10.7554/eLife.57974 (PMC8863373; doi:10.7554/eLife.57974)
Supplement: Supplementary file 1. — 6,649 unique β-lactamase protein sequences were clustered with a 90% identity threshold and the centroid of each cluster was used as a phylogenetic cluster identified for each sequence (“Phylogenetic cluster” column). All sequences were searched for the presence of cysteine residues (“Total number of cysteines” and “Positions of all cysteines” columns). Proteins with two or more cysteines after the first 30 amino acids of their primary sequence (cells shaded in grey in the “Number of cysteines after position 30” column) are potential substrates of the DSB system for organisms where oxidative protein folding is carried out by DsbA and provided that translocation of the β-lactamase outside the cytoplasm is performed by the Sec system. The first 30 amino acids of each sequence were excluded to avoid considering cysteines that are part of the signal sequence mediating the translocation of these enzymes outside the cytoplasm. Cells shaded in grey in the “Reported in pathogens” column mark β-lactamases that are found in pathogens or organisms capable of causing opportunistic infections. The Ambler class of each enzyme is indicated in the “Ambler class column” and each class (A, B1, B2, B3, C and D) is highlighted with a different color. [file elife-57974-supp1.xlsx]

## Sheet: Supplementary File 1a
Ambler class-Enzyme name	Phylogenetic cluster (90% ID)	Total number of cysteines	Position of all cysteines	Number of cysteines after position 30	Reported in pathogens	Class
A-ACI-1	A-ACI-1	7	5 12 18 22 55 65 117	3		A
A-AER-1	A-AER-1	3	25 90 137	2		A
A-AFA-1	A-AFA-1	2	69 115	2		A
A-ARL-1	A-ARL-3	2	12 14	0		A
A-ARL-2	A-ARL-3	2	12 14	0		A
A-ARL-3	A-ARL-3	2	12 14	0		A
A-ARL-4	A-ARL-3	2	12 14	0		A
A-ARL-5	A-ARL-3	2	12 14	0		A
A-ARL-6	A-ARL-3	2	12 14	0		A
A-AST-1	A-AST-1	4	24 32 98 144	3		A
A-AXC-1	A-AXC-5	3	133 253 286	3		A
A-AXC-2	A-AXC-5	3	133 253 286	3		A
A-AXC-3	A-AXC-5	3	133 253 286	3		A
A-AXC-4	A-AXC-5	3	133 253 286	3		A
A-AXC-5	A-AXC-5	3	133 253 286	3		A
A-AXC-6	A-AXC-5	3	133 253 286	3		A
A-BBI-1	A-BBI-1	1	26	0		A
A-BcI-1	A-BcI-4	1	12	0		A
A-BcI-2	A-BcI-2	1	15	0		A
A-BcI-3	A-BcI-2	1	12	0		A
A-BcI-4	A-BcI-4	1	15	0		A
A-BcI-5	A-BcI-4	1	12	0		A
A-BcIII	A-BcIII	2	24 30	0		A
A-BCL-1	A-BCL-1	2	15 20	0		A
A-BEL-1	A-BEL-2	2	61 231	2		A
A-BEL-2	A-BEL-2	2	61 231	2		A
A-BEL-3	A-BEL-2	2	61 231	2		A
A-BEL-4	A-BEL-2	2	61 231	2		A
A-BES-1	A-BES-1	1	67	1		A
A-BIC-1	A-BIC-1	2	72 242	2		A
A-BKC-1	A-BKC-1	3	91 146 289	3		A
A-BKC-2	A-BKC-1	3	91 146 289	3		A
A-BlaA-1	A-BlaA-1	2	74 128	2		A
A-BlaA-2	A-BlaA-1	3	74 120 128	3		A
A-BlaA-3	A-BlaA-1	2	74 128	2		A
A-BlaC	A-BlaC	4	24 83 135 301	3		A
A-BlaS	A-BlaS	2	71 125	2		A
A-BOR-1	A-BOR-1	3	18 79 133	2		A
A-BPS-1	A-BPS-7	4	23 75 83 129	3		A
A-BPS-1b	A-BPS-7	4	23 75 83 129	3		A
A-BPS-1c	A-BPS-7	4	23 75 83 129	3		A
A-BPS-1d	A-BPS-7	4	23 75 83 129	3		A
A-BPS-1m	A-BPS-7	4	23 75 83 129	3		A
A-BPS-2	A-BPS-7	4	23 75 83 129	3		A
A-BPS-3	A-BPS-3	3	23 74 128	2		A
A-BPS-4	A-BPS-3	3	23 74 128	2		A
A-BPS-5	A-BPS-5	3	23 75 129	2		A
A-BPS-6	A-BPS-7	4	23 75 83 129	3		A
A-BPS-7	A-BPS-7	4	23 75 83 129	3		A
A-BRO-1	A-BRO-2	3	26 129 145	2		A
A-BRO-2	A-BRO-2	3	26 129 145	2		A
A-CAD-1	A-CAD-1	0		0		A
A-CARB-1	A-CARB-2	2	72 118	2		A
A-CARB-10	A-CARB-10	3	19 79 126	2		A
A-CARB-11	A-CARB-2	2	72 118	2		A
A-CARB-12	A-CARB-2	2	72 118	2		A
A-CARB-14	A-CARB-10	3	19 79 126	2		A
A-CARB-16	A-CARB-10	3	19 79 126	2		A
A-CARB-17	A-CARB-23	3	13 69 115	2		A
A-CARB-18	A-CARB-23	3	13 69 115	2		A
A-CARB-19	A-CARB-23	3	13 69 115	2		A
A-CARB-2	A-CARB-2	3	7 88 134	2		A
A-CARB-20	A-CARB-23	3	13 69 115	2		A
A-CARB-21	A-CARB-23	3	13 69 115	2		A
A-CARB-22	A-CARB-23	3	13 69 115	2		A
A-CARB-23	A-CARB-23	3	13 71 117	2		A
A-CARB-24	A-CARB-23	3	13 69 115	2		A
A-CARB-25	A-CARB-23	3	13 69 115	2		A
A-CARB-26	A-CARB-23	3	13 69 115	2		A
A-CARB-27	A-CARB-23	3	13 69 115	2		A
A-CARB-28	A-CARB-23	3	13 69 115	2		A
A-CARB-29	A-CARB-23	3	13 69 115	2		A
A-CARB-3	A-CARB-2	2	72 118	2		A
A-CARB-30	A-CARB-23	3	13 69 115	2		A
A-CARB-31	A-CARB-23	2	69 115	2		A
A-CARB-32	A-CARB-23	3	13 69 115	2		A
A-CARB-33	A-CARB-23	3	13 69 115	2		A
A-CARB-34	A-CARB-23	3	13 69 115	2		A
A-CARB-35	A-CARB-23	3	13 69 115	2		A
A-CARB-36	A-CARB-23	3	13 69 115	2		A
A-CARB-37	A-CARB-23	3	13 69 115	2		A
A-CARB-38	A-CARB-23	3	13 69 115	2		A
A-CARB-39	A-CARB-23	3	13 69 115	2		A
A-CARB-4	A-CARB-4	2	72 118	2		A
A-CARB-40	A-CARB-23	3	13 69 115	2		A
A-CARB-41	A-CARB-23	3	13 69 115	2		A
A-CARB-42	A-CARB-56	3	13 69 115	2		A
A-CARB-43	A-CARB-23	3	13 69 115	2		A
A-CARB-44	A-CARB-23	3	13 69 115	2		A
A-CARB-45	A-CARB-23	3	13 69 115	2		A
A-CARB-46	A-CARB-23	3	13 69 115	2		A
A-CARB-47	A-CARB-23	3	13 69 115	2		A
A-CARB-48	A-CARB-23	3	13 69 115	2		A
A-CARB-49	A-CARB-10	3	19 79 126	2		A
A-CARB-5	A-CARB-10	3	19 79 126	2		A
A-CARB-50	A-CARB-10	3	19 79 126	2		A
A-CARB-51	A-CARB-2	2	72 118	2		A
A-CARB-52	A-CARB-4	2	72 118	2		A
A-CARB-53	A-CARB-2	2	72 118	2		A
A-CARB-54	A-CARB-10	3	19 79 126	2		A
A-CARB-55	A-CARB-2	2	72 118	2		A
A-CARB-56	A-CARB-56	3	13 69 115	2		A
A-CARB-57	A-CARB-56	3	13 69 115	2		A
A-CARB-6	A-CARB-2	2	72 118	2		A
A-CARB-7	A-CARB-9	2	72 118	2		A
A-CARB-8	A-CARB-10	3	19 79 126	2		A
A-CARB-9	A-CARB-9	2	72 118	2		A
A-CblA	A-CblA	2	14 135	1		A
A-CBP-1	A-CBP-1	4	17 30 86 138	2		A
A-CdiA	A-CdiA-2	2	75 188	2		A
A-CdiA-2	A-CdiA-2	1	75	1		A
A-CepA	A-CepA-6	6	16 135 160 176 214 250	5		A
A-CepA-2	A-CepA-6	6	16 135 160 176 214 250	5		A
A-CepA-3	A-CepA-6	6	16 135 160 176 214 250	5		A
A-CepA-4	A-CepA-6	6	16 135 160 176 214 250	5		A
A-CepA-5	A-CepA-6	6	16 135 160 176 214 250	5		A
A-CepA-6	A-CepA-6	6	16 135 160 176 214 250	5		A
A-CfxA	A-CfxA-8	5	18 55 94 232 276	4		A
A-CfxA-10	A-CfxA-8	5	18 55 94 232 276	4		A
A-CfxA-11	A-CfxA-8	5	18 55 94 232 276	4		A
A-CfxA-2	A-CfxA-8	5	18 55 94 232 276	4		A
A-CfxA-3	A-CfxA-8	5	18 55 94 232 276	4		A
A-CfxA-4	A-CfxA-8	5	18 55 94 232 276	4		A
A-CfxA-5	A-CfxA-8	6	18 55 94 232 259 276	5		A
A-CfxA-6	A-CfxA-8	5	18 55 94 232 276	4		A
A-CfxA-7	A-CfxA-8	5	18 55 94 232 276	4		A
A-CfxA-8	A-CfxA-8	5	18 55 94 232 276	4		A
A-CfxA-9	A-CfxA-8	5	18 55 94 232 276	4		A
A-CfxA-E-1	A-CfxA-E-1	7	13 18 55 94 232 276 282	5		A
A-CfxA-P4	A-CfxA-8	4	22 61 199 243	3		A
A-CGA-1	A-CGA-1	2	131 276	2		A
A-CIA-1	A-CIA-4	2	70 131	2		A
A-CIA-2	A-CIA-4	2	70 131	2		A
A-CIA-3	A-CIA-4	2	70 131	2		A
A-CIA-4	A-CIA-4	2	70 131	2		A
A-CKA-1	A-CKA-1	3	30 86 138	2		A
A-CKO-1	A-CKO-3	3	18 84 131	2		A
A-CKO-2	A-CKO-3	3	18 84 131	2		A
A-CKO-3	A-CKO-3	3	18 84 131	2		A
A-CM1-1	A-CM1-1	4	71 117 262 291	4		A
A-CME-1	A-CME-2	2	132 277	2		A
A-CME-2	A-CME-2	2	132 277	2		A
A-CME-3	A-CME-2	2	132 277	2		A
A-CPA-1	A-CPA-1	2	8 136	1		A
A-CRH-1	A-CRH-2	2	66 235	2		A
A-CRH-2	A-CRH-2	2	66 235	2		A
A-CRH-3	A-CRH-2	2	66 235	2		A
A-CRH-4	A-CRH-2	2	66 235	2		A
A-CRH-5	A-CRH-2	2	66 235	2		A
A-CRH-6	A-CRH-2	2	66 235	2		A
A-CRP-1	A-CRP-2	4	12 68 122 237	3		A
A-CRP-2	A-CRP-2	4	12 68 122 237	3		A
A-CSP-1	A-CSP-1	3	8 16 131	1		A
A-CST-1	A-CST-2	3	18 89 227	2		A
A-CST-2	A-CST-2	3	18 89 227	2		A
A-CTX-M-1	A-CTX-M-211	1	72	1		A
A-CTX-M-10	A-CTX-M-211	1	72	1		A
A-CTX-M-100	A-CTX-M-160	3	16 27 72	1		A
A-CTX-M-101	A-CTX-M-211	1	72	1		A
A-CTX-M-102	A-CTX-M-110	2	16 72	1		A
A-CTX-M-103	A-CTX-M-211	1	72	1		A
A-CTX-M-104	A-CTX-M-110	2	16 72	1		A
A-CTX-M-105	A-CTX-M-110	2	16 72	1		A
A-CTX-M-110	A-CTX-M-110	2	16 72	1		A
A-CTX-M-111	A-CTX-M-110	2	16 72	1		A
A-CTX-M-112	A-CTX-M-110	2	16 72	1		A
A-CTX-M-113	A-CTX-M-110	2	16 72	1		A
A-CTX-M-114	A-CTX-M-211	1	72	1		A
A-CTX-M-115	A-KLUA-5	1	72	1		A
A-CTX-M-116	A-CTX-M-211	1	72	1		A
A-CTX-M-117	A-CTX-M-211	1	72	1		A
A-CTX-M-12	A-CTX-M-211	1	72	1		A
A-CTX-M-121	A-CTX-M-110	2	16 72	1		A
A-CTX-M-122	A-CTX-M-110	2	16 72	1		A
A-CTX-M-123	A-CTX-M-211	1	72	1		A
A-CTX-M-124	A-KLUA-5	1	72	1		A
A-CTX-M-125	A-CTX-M-110	2	16 72	1		A
A-CTX-M-126	A-CTX-M-110	2	16 72	1		A
A-CTX-M-127	A-CTX-M-211	1	72	1		A
A-CTX-M-129	A-CTX-M-110	2	16 72	1		A
A-CTX-M-13	A-CTX-M-110	2	16 72	1		A
A-CTX-M-130	A-CTX-M-110	2	16 72	1		A
A-CTX-M-131	A-KLUA-5	1	72	1		A
A-CTX-M-132	A-CTX-M-211	1	72	1		A
A-CTX-M-134	A-CTX-M-110	2	16 72	1		A
A-CTX-M-136	A-CTX-M-211	1	72	1		A
A-CTX-M-137	A-CTX-M-110	2	16 72	1		A
A-CTX-M-138	A-CTX-M-211	1	72	1		A
A-CTX-M-139	A-CTX-M-211	1	72	1		A
A-CTX-M-14	A-CTX-M-110	2	16 72	1		A
A-CTX-M-140	A-CTX-M-110	2	16 72	1		A
A-CTX-M-141	A-KLUA-5	1	72	1		A
A-CTX-M-142	A-CTX-M-211	1	72	1		A
A-CTX-M-143	A-CTX-M-211	1	72	1		A
A-CTX-M-144	A-CTX-M-211	1	72	1		A
A-CTX-M-146	A-CTX-M-211	1	72	1		A
A-CTX-M-147	A-CTX-M-110	2	16 72	1		A
A-CTX-M-148	A-CTX-M-110	2	16 72	1		A
A-CTX-M-15	A-CTX-M-211	1	72	1		A
A-CTX-M-150	A-CTX-M-211	1	72	1		A
A-CTX-M-151	A-CTX-M-151	1	80	1		A
A-CTX-M-152	A-CTX-M-160	2	15 71	1		A
A-CTX-M-153	A-CTX-M-211	1	72	1		A
A-CTX-M-154	A-CTX-M-211	1	72	1		A
A-CTX-M-155	A-CTX-M-211	1	72	1		A
A-CTX-M-156	A-CTX-M-211	1	72	1		A
A-CTX-M-157	A-CTX-M-211	1	72	1		A
A-CTX-M-158	A-CTX-M-211	1	72	1		A
A-CTX-M-159	A-CTX-M-110	2	16 72	1		A
A-CTX-M-16	A-CTX-M-110	2	16 72	1		A
A-CTX-M-160	A-CTX-M-160	3	16 27 72	1		A
A-CTX-M-161	A-CTX-M-110	2	16 72	1		A
A-CTX-M-162	A-CTX-M-211	1	72	1		A
A-CTX-M-163	A-CTX-M-211	1	72	1		A
A-CTX-M-164	A-CTX-M-211	1	72	1		A
A-CTX-M-165	A-KLUA-5	1	72	1		A
A-CTX-M-166	A-CTX-M-211	1	72	1		A
A-CTX-M-167	A-CTX-M-211	2	72 241	2		A
A-CTX-M-168	A-CTX-M-110	2	16 72	1		A
A-CTX-M-169	A-CTX-M-211	1	72	1		A
A-CTX-M-17	A-CTX-M-110	2	16 72	1		A
A-CTX-M-170	A-CTX-M-211	1	72	1		A
A-CTX-M-171	A-KLUA-5	1	72	1		A
A-CTX-M-172	A-CTX-M-211	1	72	1		A
A-CTX-M-173	A-CTX-M-211	1	72	1		A
A-CTX-M-174	A-CTX-M-110	2	16 72	1		A
A-CTX-M-175	A-CTX-M-211	1	72	1		A
A-CTX-M-176	A-CTX-M-211	1	72	1		A
A-CTX-M-177	A-CTX-M-211	1	72	1		A
A-CTX-M-178	A-CTX-M-211	1	72	1		A
A-CTX-M-179	A-CTX-M-211	1	72	1		A
A-CTX-M-180	A-CTX-M-211	1	72	1		A
A-CTX-M-181	A-CTX-M-211	1	72	1		A
A-CTX-M-182	A-CTX-M-211	1	72	1		A
A-CTX-M-183	A-CTX-M-211	1	72	1		A
A-CTX-M-184	A-CTX-M-211	1	72	1		A
A-CTX-M-185	A-CTX-M-160	2	16 72	1		A
A-CTX-M-186	A-CTX-M-211	1	72	1		A
A-CTX-M-187	A-CTX-M-211	1	72	1		A
A-CTX-M-188	A-CTX-M-211	1	72	1		A
A-CTX-M-189	A-CTX-M-211	1	72	1		A
A-CTX-M-19	A-CTX-M-110	2	16 72	1		A
A-CTX-M-190	A-CTX-M-211	1	72	1		A
A-CTX-M-191	A-CTX-M-110	2	16 72	1		A
A-CTX-M-192	A-CTX-M-110	2	16 72	1		A
A-CTX-M-193	A-CTX-M-211	1	72	1		A
A-CTX-M-194	A-CTX-M-211	1	72	1		A
A-CTX-M-195	A-CTX-M-110	2	16 72	1		A
A-CTX-M-196	A-CTX-M-110	2	16 72	1		A
A-CTX-M-197	A-CTX-M-211	1	72	1		A
A-CTX-M-198	A-CTX-M-110	2	16 72	1		A
A-CTX-M-199	A-CTX-M-211	1	72	1		A
A-CTX-M-2	A-KLUA-5	1	72	1		A
A-CTX-M-20	A-KLUA-5	1	72	1		A
A-CTX-M-200	A-KLUA-5	1	72	1		A
A-CTX-M-201	A-CTX-M-110	2	16 72	1		A
A-CTX-M-202	A-CTX-M-211	1	72	1		A
A-CTX-M-203	A-CTX-M-211	1	72	1		A
A-CTX-M-204	A-CTX-M-211	1	72	1		A
A-CTX-M-206	A-CTX-M-211	1	72	1		A
A-CTX-M-207	A-CTX-M-211	1	72	1		A
A-CTX-M-208	A-CTX-M-211	1	72	1		A
A-CTX-M-209	A-CTX-M-211	1	72	1		A
A-CTX-M-21	A-CTX-M-110	1	72	1		A
A-CTX-M-210	A-CTX-M-211	1	72	1		A
A-CTX-M-211	A-CTX-M-211	1	75	1		A
A-CTX-M-212	A-CTX-M-211	1	72	1		A
A-CTX-M-214	A-CTX-M-110	2	16 72	1		A
A-CTX-M-215	A-CTX-M-110	2	16 72	1		A
A-CTX-M-216	A-CTX-M-211	1	72	1		A
A-CTX-M-217	A-CTX-M-160	3	16 27 72	1		A
A-CTX-M-218	A-CTX-M-211	1	72	1		A
A-CTX-M-219	A-CTX-M-110	2	16 72	1		A
A-CTX-M-22	A-CTX-M-211	1	72	1		A
A-CTX-M-220	A-CTX-M-211	1	72	1		A
A-CTX-M-221	A-CTX-M-110	2	16 72	1		A
A-CTX-M-222	A-CTX-M-211	1	72	1		A
A-CTX-M-223	A-CTX-M-110	2	16 72	1		A
A-CTX-M-224	A-CTX-M-211	1	72	1		A
A-CTX-M-225	A-CTX-M-211	1	72	1		A
A-CTX-M-226	A-CTX-M-211	1	72	1		A
A-CTX-M-227	A-CTX-M-211	1	72	1		A
A-CTX-M-228	A-CTX-M-211	1	72	1		A
A-CTX-M-229	A-KLUA-5	1	72	1		A
A-CTX-M-23	A-CTX-M-211	1	72	1		A
A-CTX-M-230	A-CTX-M-211	1	72	1		A
A-CTX-M-231	A-CTX-M-211	1	72	1		A
A-CTX-M-232	A-CTX-M-211	1	72	1		A
A-CTX-M-233	A-CTX-M-110	2	16 72	1		A
A-CTX-M-234	A-CTX-M-211	1	72	1		A
A-CTX-M-235	A-CTX-M-110	2	16 72	1		A
A-CTX-M-236	A-CTX-M-211	1	72	1		A
A-CTX-M-237	A-CTX-M-211	1	72	1		A
A-CTX-M-238	A-CTX-M-211	1	72	1		A
A-CTX-M-239	A-CTX-M-110	2	16 72	1		A
A-CTX-M-24	A-CTX-M-110	2	16 72	1		A
A-CTX-M-240	A-CTX-M-110	2	16 72	1		A
A-CTX-M-241	A-CTX-M-110	2	16 72	1		A
A-CTX-M-242	A-CTX-M-110	2	16 72	1		A
A-CTX-M-243	A-CTX-M-110	2	16 72	1		A
A-CTX-M-244	A-CTX-M-211	1	72	1		A
A-CTX-M-245	A-CTX-M-211	1	72	1		A
A-CTX-M-246	A-CTX-M-211	1	72	1		A
A-CTX-M-25	A-CTX-M-160	3	16 27 72	1		A
A-CTX-M-26	A-CTX-M-160	3	16 27 72	1		A
A-CTX-M-27	A-CTX-M-110	2	16 72	1		A
A-CTX-M-28	A-CTX-M-211	1	72	1		A
A-CTX-M-29	A-CTX-M-211	1	72	1		A
A-CTX-M-3	A-CTX-M-211	1	72	1		A
A-CTX-M-30	A-CTX-M-211	1	72	1		A
A-CTX-M-31	A-KLUA-5	1	72	1		A
A-CTX-M-32	A-CTX-M-211	1	72	1		A
A-CTX-M-33	A-CTX-M-211	1	72	1		A
A-CTX-M-34	A-CTX-M-211	2	72 241	2		A
A-CTX-M-35	A-KLUA-5	1	72	1		A
A-CTX-M-36	A-CTX-M-211	1	72	1		A
A-CTX-M-37	A-CTX-M-211	1	72	1		A
A-CTX-M-38	A-CTX-M-110	2	16 72	1		A
A-CTX-M-39	A-CTX-M-160	3	16 27 72	1		A
A-CTX-M-4	A-KLUA-5	1	72	1		A
A-CTX-M-40	A-CTX-M-8	2	15 71	1		A
A-CTX-M-41	A-CTX-M-160	3	16 27 72	1		A
A-CTX-M-42	A-CTX-M-211	1	72	1		A
A-CTX-M-43	A-KLUA-5	1	72	1		A
A-CTX-M-44	A-KLUA-5	1	72	1		A
A-CTX-M-45	A-CTX-M-45	2	16 72	1		A
A-CTX-M-46	A-CTX-M-110	2	16 72	1		A
A-CTX-M-47	A-CTX-M-110	2	16 72	1		A
A-CTX-M-48	A-CTX-M-110	2	16 72	1		A
A-CTX-M-49	A-CTX-M-110	2	16 72	1		A
A-CTX-M-5	A-KLUA-5	1	72	1		A
A-CTX-M-50	A-CTX-M-110	2	16 72	1		A
A-CTX-M-51	A-CTX-M-110	2	16 72	1		A
A-CTX-M-52	A-CTX-M-211	1	72	1		A
A-CTX-M-53	A-CTX-M-211	1	72	1		A
A-CTX-M-54	A-CTX-M-211	1	72	1		A
A-CTX-M-55	A-CTX-M-211	1	72	1		A
A-CTX-M-56	A-KLUA-5	1	72	1		A
A-CTX-M-58	A-CTX-M-211	1	72	1		A
A-CTX-M-59	A-KLUA-5	1	72	1		A
A-CTX-M-6	A-KLUA-5	2	72 231	2		A
A-CTX-M-60	A-CTX-M-211	1	72	1		A
A-CTX-M-61	A-CTX-M-211	1	72	1		A
A-CTX-M-62	A-CTX-M-211	1	72	1		A
A-CTX-M-63	A-CTX-M-8	2	15 71	1		A
A-CTX-M-64	A-CTX-M-211	1	72	1		A
A-CTX-M-65	A-CTX-M-110	2	16 72	1		A
A-CTX-M-66	A-CTX-M-211	1	72	1		A
A-CTX-M-67	A-CTX-M-110	2	16 72	1		A
A-CTX-M-68	A-CTX-M-211	1	72	1		A
A-CTX-M-69	A-CTX-M-211	1	72	1		A
A-CTX-M-7	A-KLUA-5	1	72	1		A
A-CTX-M-71	A-CTX-M-211	2	72 241	2		A
A-CTX-M-72	A-CTX-M-211	1	72	1		A
A-CTX-M-73	A-CTX-M-110	2	16 72	1		A
A-CTX-M-74	A-KLUA-5	1	72	1		A
A-CTX-M-75	A-KLUA-5	1	72	1		A
A-CTX-M-76	A-KLUA-5	1	72	1		A
A-CTX-M-77	A-KLUA-5	1	72	1		A
A-CTX-M-78	A-CTX-M-160	2	16 72	1		A
A-CTX-M-79	A-CTX-M-211	1	72	1		A
A-CTX-M-8	A-CTX-M-8	2	16 72	1		A
A-CTX-M-80	A-CTX-M-211	1	72	1		A
A-CTX-M-81	A-CTX-M-110	2	16 72	1		A
A-CTX-M-82	A-CTX-M-211	1	72	1		A
A-CTX-M-83	A-CTX-M-110	2	16 72	1		A
A-CTX-M-84	A-CTX-M-110	2	16 72	1		A
A-CTX-M-85	A-CTX-M-110	2	16 72	1		A
A-CTX-M-86	A-CTX-M-110	2	16 72	1		A
A-CTX-M-87	A-CTX-M-110	2	16 72	1		A
A-CTX-M-88	A-CTX-M-211	1	72	1		A
A-CTX-M-89	A-CTX-M-160	3	16 27 72	1		A
A-CTX-M-9	A-CTX-M-110	2	16 72	1		A
A-CTX-M-90	A-CTX-M-110	2	16 72	1		A
A-CTX-M-91	A-CTX-M-160	3	16 27 72	1		A
A-CTX-M-92	A-KLUA-5	1	72	1		A
A-CTX-M-93	A-CTX-M-110	2	16 72	1		A
A-CTX-M-94	A-CTX-M-160	3	16 27 72	1		A
A-CTX-M-95	A-KLUA-5	1	72	1		A
A-CTX-M-96	A-CTX-M-211	1	72	1		A
A-CTX-M-97	A-KLUA-5	1	72	1		A
A-CTX-M-98	A-CTX-M-110	2	16 72	1		A
A-CTX-M-99	A-CTX-M-110	2	16 72	1		A
A-CTX-M-P4	A-CTX-M-211	1	71	1		A
A-CTX-M-P44	A-CTX-M-211	1	72	1		A
A-CTX-M-P45	A-CTX-M-110	2	16 72	1		A
A-CTX-M-P5	A-CTX-M-211	1	71	1		A
A-CTX-M-P6	A-CTX-M-211	1	71	1		A
A-CumA-1	A-CumA-3	0		0		A
A-CumA-2	A-CumA-3	0		0		A
A-CumA-3	A-CumA-3	0		0		A
A-CumA-P1	A-CumA-3	0		0		A
A-CzoA-1	A-CzoA-1	4	23 76 132 253	3		A
A-DBA-1	A-DBA-1	4	74 128 213 219	4		A
A-DES-1	A-DES-1	7	17 86 137 201 209 228 311	6		A
A-ERP-1	A-ERP-1	2	74 127	2		A
A-FAR-1	A-FAR-1	3	26 98 144	2		A
A-FEC-1	A-CTX-M-211	1	72	1		A
A-FLC-1	A-FRI-8	3	17 72 242	2		A
A-FONA	A-FONA-6	1	76	1		A
A-FONA-1	A-FONA-6	1	76	1		A
A-FONA-2	A-FONA-6	1	76	1		A
A-FONA-3	A-FONA-6	1	76	1		A
A-FONA-4	A-FONA-6	1	76	1		A
A-FONA-5	A-FONA-6	1	76	1		A
A-FONA-6	A-FONA-6	1	76	1		A
A-FONA-7	A-FONA-6	1	76	1		A
A-FPH-1	A-FPH-1	2	61 231	2		A
A-FRI-1	A-FRI-2	3	16 68 238	2		A
A-FRI-10	A-FRI-2	3	16 68 238	2		A
A-FRI-2	A-FRI-2	3	16 68 238	2		A
A-FRI-3	A-FRI-2	3	16 68 238	2		A
A-FRI-4	A-FRI-2	3	16 68 238	2		A
A-FRI-5	A-FRI-5	4	4 15 70 240	2		A
A-FRI-6	A-FRI-2	3	16 68 238	2		A
A-FRI-7	A-FRI-2	3	16 68 238	2		A
A-FRI-8	A-FRI-8	3	17 72 242	2		A
A-FRI-9	A-FRI-2	3	16 68 238	2		A
A-FTU-1	A-FTU-2	2	60 230	2		A
A-FTU-2	A-FTU-2	2	60 230	2		A
A-GES-1	A-GES-42	2	63 233	2		A
A-GES-10	A-GES-42	3	63 125 233	3		A
A-GES-11	A-GES-42	2	63 233	2		A
A-GES-12	A-GES-42	2	63 233	2		A
A-GES-13	A-GES-42	2	63 233	2		A
A-GES-14	A-GES-42	2	63 233	2		A
A-GES-15	A-GES-42	2	63 233	2		A
A-GES-16	A-GES-42	2	63 233	2		A
A-GES-17	A-GES-42	2	63 233	2		A
A-GES-18	A-GES-42	2	63 233	2		A
A-GES-19	A-GES-42	2	63 233	2		A
A-GES-2	A-GES-42	2	63 233	2		A
A-GES-20	A-GES-42	2	63 233	2		A
A-GES-21	A-GES-42	2	63 233	2		A
A-GES-22	A-GES-42	2	63 233	2		A
A-GES-23	A-GES-42	2	63 233	2		A
A-GES-24	A-GES-42	2	63 233	2		A
A-GES-25	A-GES-42	2	63 233	2		A
A-GES-26	A-GES-42	2	63 233	2		A
A-GES-27	A-GES-42	2	63 233	2		A
A-GES-28	A-GES-42	2	63 233	2		A
A-GES-29	A-GES-42	2	63 233	2		A
A-GES-3	A-GES-42	2	63 233	2		A
A-GES-30	A-GES-42	3	33 63 233	3		A
A-GES-31	A-GES-42	2	63 233	2		A
A-GES-32	A-GES-42	2	63 233	2		A
A-GES-33	A-GES-42	2	63 233	2		A
A-GES-34	A-GES-42	2	63 233	2		A
A-GES-35	A-GES-42	2	63 233	2		A
A-GES-36	A-GES-42	2	63 233	2		A
A-GES-37	A-GES-42	2	63 233	2		A
A-GES-38	A-GES-42	2	63 233	2		A
A-GES-39	A-GES-42	2	63 233	2		A
A-GES-4	A-GES-42	2	63 233	2		A
A-GES-40	A-GES-42	2	63 233	2		A
A-GES-41	A-GES-42	2	63 233	2		A
A-GES-42	A-GES-42	2	63 236	2		A
A-GES-43	A-GES-42	2	63 233	2		A
A-GES-44	A-GES-42	2	63 233	2		A
A-GES-45	A-GES-42	2	63 233	2		A
A-GES-46	A-GES-42	2	63 233	2		A
A-GES-47	A-GES-42	2	63 233	2		A
A-GES-48	A-GES-42	2	63 233	2		A
A-GES-5	A-GES-42	2	63 233	2		A
A-GES-6	A-GES-42	2	63 233	2		A
A-GES-7	A-GES-42	2	63 233	2		A
A-GES-8	A-GES-42	2	63 233	2		A
A-GES-9	A-GES-42	2	63 233	2		A
A-GIL-1	A-GIL-1	3	16 73 119	2		A
A-GPA-1	A-GPA-1	5	5 17 22 80 127	2		A
A-GPC-1	A-GPC-1	3	75 130 273	3		A
A-GRI-1	A-GRI-1	2	22 75	1		A
A-HER-1	A-HER-5	2	77 124	2		A
A-HER-2	A-HER-5	2	77 124	2		A
A-HER-3	A-HER-5	2	77 124	2		A
A-HER-4	A-HER-5	2	77 124	2		A
A-HER-5	A-HER-5	2	77 124	2		A
A-HER-6	A-HER-5	2	77 124	2		A
A-HER-8	A-HER-5	2	77 124	2		A
A-HMS-1	A-HMS-1	2	75 121	2		A
A-HMS-2	A-HMS-1	2	75 121	2		A
A-HugA	A-CumA-3	0		0		A
A-IMI-1	A-IMI-12	3	17 70 240	2		A
A-IMI-12	A-IMI-12	3	17 70 240	2		A
A-IMI-13	A-IMI-12	3	17 70 240	2		A
A-IMI-14	A-IMI-12	3	17 70 240	2		A
A-IMI-15	A-IMI-12	3	17 70 240	2		A
A-IMI-16	A-IMI-12	3	17 70 240	2		A
A-IMI-17	A-IMI-12	3	17 70 240	2		A
A-IMI-18	A-IMI-12	3	17 70 240	2		A
A-IMI-19	A-IMI-12	3	17 70 240	2		A
A-IMI-2	A-IMI-12	3	17 70 240	2		A
A-IMI-21	A-IMI-12	3	17 70 240	2		A
A-IMI-3	A-IMI-12	3	17 70 240	2		A
A-IMI-4	A-IMI-12	3	17 70 240	2		A
A-IMI-5	A-IMI-5	2	70 240	2		A
A-IMI-6	A-IMI-12	3	17 70 240	2		A
A-IMI-7	A-IMI-12	3	17 70 240	2		A
A-IMI-8	A-IMI-8	2	70 240	2		A
A-IMI-9	A-IMI-12	3	17 70 240	2		A
A-KLUA-1	A-KLUA-5	1	72	1		A
A-KLUA-10	A-KLUA-5	1	72	1		A
A-KLUA-11	A-KLUA-5	1	72	1		A
A-KLUA-12	A-KLUA-5	1	66	1		A
A-KLUA-14	A-KLUA-5	1	72	1		A
A-KLUA-15	A-KLUA-5	1	72	1		A
A-KLUA-16	A-KLUA-5	1	72	1		A
A-KLUA-17	A-KLUA-5	1	72	1		A
A-KLUA-2	A-KLUA-5	1	72	1		A
A-KLUA-5	A-KLUA-5	1	72	1		A
A-KLUA-6	A-KLUA-5	1	72	1		A
A-KLUA-8	A-KLUA-5	1	72	1		A
A-KLUA-9	A-KLUA-5	1	72	1		A
A-KLUB-1	A-CTX-M-211	1	72	1		A
A-KLUB-2	A-CTX-M-211	1	72	1		A
A-KLUC-1	A-KLUC-3	1	72	1		A
A-KLUC-2	A-KLUC-3	1	72	1		A
A-KLUC-3	A-KLUC-3	1	72	1		A
A-KLUC-4	A-KLUC-3	1	72	1		A
A-KLUC-5	A-KLUC-3	1	72	1		A
A-KLUC-6	A-KLUC-6	1	72	1		A
A-KLUG-1	A-CTX-M-8	2	16 72	1		A
A-KLUG-2	A-CTX-M-160	2	15 71	1		A
A-KLUG-3	A-CTX-M-160	2	16 72	1		A
A-KLUG-4	A-CTX-M-160	2	16 72	1		A
A-KLUG-5	A-CTX-M-160	3	16 27 72	1		A
A-KLUY-1	A-CTX-M-110	2	16 72	1		A
A-KLUY-2	A-CTX-M-110	2	16 72	1		A
A-KLUY-3	A-CTX-M-110	2	16 72	1		A
A-KLUY-4	A-CTX-M-110	2	16 72	1		A
A-KLUY-5	A-CTX-M-110	2	16 72	1		A
A-KPC-10	A-KPC-44	3	12 68 237	2		A
A-KPC-11	A-KPC-44	3	12 68 237	2		A
A-KPC-12	A-KPC-44	3	12 68 237	2		A
A-KPC-13	A-KPC-44	3	12 68 237	2		A
A-KPC-14	A-KPC-44	3	12 68 237	2		A
A-KPC-15	A-KPC-44	3	12 68 237	2		A
A-KPC-16	A-KPC-44	3	12 68 237	2		A
A-KPC-17	A-KPC-44	3	12 68 237	2		A
A-KPC-18	A-KPC-44	3	12 68 237	2		A
A-KPC-19	A-KPC-44	3	12 68 237	2		A
A-KPC-2	A-KPC-44	3	12 68 237	2		A
A-KPC-20	A-KPC-44	3	12 68 237	2		A
A-KPC-21	A-KPC-44	3	12 68 237	2		A
A-KPC-22	A-KPC-44	3	12 68 237	2		A
A-KPC-23	A-KPC-44	3	12 68 237	2		A
A-KPC-24	A-KPC-44	3	12 68 237	2		A
A-KPC-25	A-KPC-44	3	12 68 239	2		A
A-KPC-26	A-KPC-44	3	12 68 237	2		A
A-KPC-27	A-KPC-44	3	12 68 237	2		A
A-KPC-28	A-KPC-44	3	12 68 237	2		A
A-KPC-29	A-KPC-44	3	12 68 237	2		A
A-KPC-3	A-KPC-44	3	12 68 237	2		A
A-KPC-30	A-KPC-44	3	12 68 237	2		A
A-KPC-31	A-KPC-44	3	12 68 237	2		A
A-KPC-32	A-KPC-44	3	12 68 237	2		A
A-KPC-33	A-KPC-44	3	12 68 237	2		A
A-KPC-34	A-KPC-44	3	12 68 237	2		A
A-KPC-35	A-KPC-44	3	12 68 237	2		A
A-KPC-36	A-KPC-44	3	12 68 237	2		A
A-KPC-37	A-KPC-44	3	12 68 237	2		A
A-KPC-38	A-KPC-44	3	12 68 237	2		A
A-KPC-39	A-KPC-44	3	12 68 237	2		A
A-KPC-4	A-KPC-44	3	12 68 237	2		A
A-KPC-40	A-KPC-44	3	12 68 239	2		A
A-KPC-41	A-KPC-44	3	12 68 237	2		A
A-KPC-42	A-KPC-44	3	12 68 237	2		A
A-KPC-43	A-KPC-44	3	12 68 237	2		A
A-KPC-44	A-KPC-44	3	12 68 237	2		A
A-KPC-45	A-KPC-44	3	12 68 237	2		A
A-KPC-46	A-KPC-44	3	12 68 237	2		A
A-KPC-47	A-KPC-44	3	12 68 237	2		A
A-KPC-48	A-KPC-44	3	12 68 237	2		A
A-KPC-49	A-KPC-44	3	12 68 237	2		A
A-KPC-5	A-KPC-44	3	12 68 237	2		A
A-KPC-50	A-KPC-44	3	12 68 237	2		A
A-KPC-51	A-KPC-44	3	12 68 237	2		A
A-KPC-52	A-KPC-44	3	12 68 237	2		A
A-KPC-53	A-KPC-44	3	12 68 239	2		A
A-KPC-54	A-KPC-44	3	12 68 237	2		A
A-KPC-55	A-KPC-44	3	12 68 237	2		A
A-KPC-56	A-KPC-44	3	12 68 237	2		A
A-KPC-57	A-KPC-44	3	12 68 237	2		A
A-KPC-58	A-KPC-44	3	12 68 237	2		A
A-KPC-59	A-KPC-44	3	12 68 237	2		A
A-KPC-6	A-KPC-44	3	12 68 237	2		A
A-KPC-60	A-KPC-44	3	12 68 237	2		A
A-KPC-61	A-KPC-44	3	12 68 237	2		A
A-KPC-62	A-KPC-44	3	12 68 237	2		A
A-KPC-63	A-KPC-44	3	12 68 237	2		A
A-KPC-64	A-KPC-44	3	12 68 238	2		A
A-KPC-65	A-KPC-44	3	12 68 239	2		A
A-KPC-66	A-KPC-44	3	12 68 235	2		A
A-KPC-67	A-KPC-44	3	12 68 237	2		A
A-KPC-68	A-KPC-44	3	12 68 239	2		A
A-KPC-69	A-KPC-44	3	12 68 239	2		A
A-KPC-7	A-KPC-44	3	12 68 237	2		A
A-KPC-70	A-KPC-44	3	12 68 237	2		A
A-KPC-72	A-KPC-44	3	12 68 237	2		A
A-KPC-73	A-KPC-44	3	12 68 235	2		A
A-KPC-74	A-KPC-44	3	12 68 237	2		A
A-KPC-75	A-KPC-44	3	12 68 237	2		A
A-KPC-78	A-KPC-44	3	12 68 237	2		A
A-KPC-79	A-KPC-44	3	12 68 237	2		A
A-KPC-8	A-KPC-44	3	12 68 237	2		A
A-KPC-80	A-KPC-44	3	12 68 237	2		A
A-KPC-81	A-KPC-44	3	12 68 236	2		A
A-KPC-82	A-KPC-44	3	12 68 237	2		A
A-KPC-84	A-KPC-44	3	12 68 237	2		A
A-KPC-85	A-KPC-44	3	12 68 237	2		A
A-KPC-86	A-KPC-44	3	12 68 237	2		A
A-KPC-87	A-KPC-44	3	12 68 237	2		A
A-KPC-88	A-KPC-44	3	12 68 237	2		A
A-KPC-9	A-KPC-44	3	7 63 232	2		A
A-L2-1	A-L2-20	3	82 136 233	3		A
A-L2-2	A-L2-20	4	54 82 136 233	4		A
A-L2-20	A-L2-20	4	54 82 136 233	4		A
A-L2-28	A-L2-20	4	54 82 136 233	4		A
A-L2-3	A-L2-20	4	54 82 136 233	4		A
A-L2-4	A-L2-20	4	54 82 136 233	4		A
A-L2-43	A-L2-20	4	54 82 136 233	4		A
A-L2-47	A-L2-20	4	54 82 136 233	4		A
A-L2-49	A-L2-20	4	54 82 136 233	4		A
A-L2-54	A-L2-20	4	54 82 136 233	4		A
A-L2-79	A-L2-79	4	54 82 136 233	4		A
A-L2-80	A-L2-82	3	83 137 234	3		A
A-L2-81	A-L2-20	5	54 82 136 233 271	5		A
A-L2-82	A-L2-82	3	83 137 234	3		A
A-L2-C-3	A-L2-C-5	4	54 82 136 233	4		A
A-L2-C-5	A-L2-C-5	4	54 82 136 233	4		A
A-L2-E-10	A-L2-82	3	83 137 234	3		A
A-L2-E-13	A-L2-82	3	83 137 234	3		A
A-L2-E-28	A-L2-82	3	83 137 234	3		A
A-L2-E-29	A-L2-82	3	83 137 234	3		A
A-L2-E-31	A-L2-82	3	83 137 234	3		A
A-L2-E-9	A-L2-82	3	80 134 231	3		A
A-LAP-1	A-LAP-1	3	16 74 120	2		A
A-LAP-2	A-LAP-1	3	16 74 120	2		A
A-LEN-1	A-LEN-50	3	7 73 119	2		A
A-LEN-10	A-LEN-50	3	7 73 119	2		A
A-LEN-11	A-LEN-50	3	7 73 119	2		A
A-LEN-12	A-LEN-50	3	7 73 119	2		A
A-LEN-13	A-LEN-50	3	7 73 119	2		A
A-LEN-15	A-LEN-50	3	7 73 119	2		A
A-LEN-16	A-LEN-50	3	7 73 119	2		A
A-LEN-17	A-LEN-50	3	7 73 119	2		A
A-LEN-18	A-LEN-50	3	7 73 119	2		A
A-LEN-19	A-LEN-50	3	7 73 119	2		A
A-LEN-2	A-LEN-50	3	7 73 119	2		A
A-LEN-20	A-LEN-50	3	7 73 119	2		A
A-LEN-21	A-LEN-50	3	7 73 119	2		A
A-LEN-22	A-LEN-50	3	7 73 119	2		A
A-LEN-23	A-LEN-50	3	7 73 119	2		A
A-LEN-24	A-LEN-50	3	7 73 119	2		A
A-LEN-25	A-LEN-50	3	7 73 119	2		A
A-LEN-26	A-LEN-50	3	7 73 119	2		A
A-LEN-27	A-LEN-50	3	7 73 119	2		A
A-LEN-28	A-LEN-50	3	7 73 119	2		A
A-LEN-29	A-LEN-50	3	7 73 119	2		A
A-LEN-30	A-LEN-50	3	7 73 119	2		A
A-LEN-31	A-LEN-50	3	7 73 119	2		A
A-LEN-32	A-LEN-50	3	7 73 119	2		A
A-LEN-33	A-LEN-50	3	7 73 119	2		A
A-LEN-34	A-LEN-50	3	7 73 119	2		A
A-LEN-35	A-LEN-50	3	7 73 119	2		A
A-LEN-36	A-LEN-50	3	7 73 119	2		A
A-LEN-37	A-LEN-50	3	7 73 119	2		A
A-LEN-38	A-LEN-50	3	7 73 119	2		A
A-LEN-39	A-LEN-50	3	7 73 119	2		A
A-LEN-40	A-LEN-50	3	7 73 119	2		A
A-LEN-41	A-LEN-50	3	7 73 119	2		A
A-LEN-42	A-LEN-50	3	7 73 119	2		A
A-LEN-43	A-LEN-50	3	7 73 119	2		A
A-LEN-44		5	20 42 55 121 167	4		A
A-LEN-45	A-LEN-50	3	7 73 119	2		A
A-LEN-46	A-LEN-50	3	7 73 119	2		A
A-LEN-47	A-LEN-50	3	7 73 119	2		A
A-LEN-48	A-LEN-50	3	7 73 119	2		A
A-LEN-49	A-LEN-50	2	7 119	1		A
A-LEN-5	A-LEN-50	3	7 73 119	2		A
A-LEN-50	A-LEN-50	4	7 73 119 286	3		A
A-LEN-51	A-LEN-50	3	7 73 119	2		A
A-LEN-55	A-LEN-50	3	7 73 119	2		A
A-LEN-56	A-LEN-50	3	7 73 119	2		A
A-LEN-57	A-LEN-50	3	7 73 119	2		A
A-LEN-58	A-LEN-50	3	7 73 119	2		A
A-LEN-59	A-LEN-50	3	7 73 119	2		A
A-LEN-7	A-LEN-50	3	7 73 119	2		A
A-LEN-8	A-LEN-50	3	7 73 119	2		A
A-LEN-9	A-LEN-50	3	7 73 119	2		A
A-LEN-P5	A-LEN-50	2	66 112	2		A
A-LEN-P6	A-LEN-50	2	66 112	2		A
A-LEN-P7	A-LEN-50	3	7 73 119	2		A
A-LEN-P8	A-LEN-50	3	7 73 119	2		A
A-LEN-P9	A-LEN-50	3	7 73 119	2		A
A-LUS-1	A-LUS-1	3	12 139 212	2		A
A-LUT-1	A-LUT-1	2	54 129	2		A
A-LUT-2	A-LUT-1	2	54 129	2		A
A-LUT-3	A-LUT-1	2	54 129	2		A
A-LUT-4	A-LUT-1	2	54 129	2		A
A-LUT-5	A-LUT-1	2	54 129	2		A
A-LUT-6	A-LUT-1	2	54 129	2		A
A-MAB-1	A-MAB-1	3	22 70 124	2		A
A-MAL-1	A-CKO-3	3	18 84 131	2		A
A-MAL-2	A-CKO-3	3	18 83 130	2		A
A-MFO-1	A-MFO-1	2	74 128	2		A
A-MIA-1	A-MIA-1	2	21 97	1		A
A-MIN-1	A-MIN-1	2	77 133	2		A
A-MM3-1	A-MM3-1	2	82 137	2		A
A-MP-1	A-MP-1	3	11 73 119	2		A
A-NmcA	A-IMI-12	3	17 70 240	2		A
A-OHIO-1	A-SHV-100	3	7 73 119	2		A
A-OIH-1	A-OIH-1	1	24	0		A
A-OKP-A-1	A-OKP-B-32	3	7 73 119	2		A
A-OKP-A-10	A-OKP-B-32	4	3 7 73 119	2		A
A-OKP-A-11	A-OKP-B-32	3	7 73 119	2		A
A-OKP-A-12	A-OKP-B-32	3	7 73 119	2		A
A-OKP-A-13	A-OKP-B-32	3	7 73 119	2		A
A-OKP-A-14	A-OKP-B-32	3	7 73 119	2		A
A-OKP-A-15	A-OKP-B-32	3	7 68 114	2		A
A-OKP-A-16	A-OKP-B-32	3	7 73 119	2		A
A-OKP-A-17	A-OKP-B-32	3	7 73 119	2		A
A-OKP-A-18	A-OKP-B-32	3	7 73 119	2		A
A-OKP-A-19	A-OKP-B-32	3	7 73 119	2		A
A-OKP-A-2	A-OKP-B-32	3	7 73 119	2		A
A-OKP-A-20	A-OKP-B-32	3	7 73 119	2		A
A-OKP-A-21	A-OKP-B-32	3	7 73 119	2		A
A-OKP-A-3	A-OKP-B-32	3	7 73 119	2		A
A-OKP-A-4	A-OKP-B-32	3	7 73 119	2		A
A-OKP-A-5	A-OKP-B-32	3	7 73 119	2		A
A-OKP-A-6	A-OKP-B-32	3	7 73 119	2		A
A-OKP-A-7	A-OKP-B-32	4	3 7 73 119	2		A
A-OKP-A-8	A-OKP-B-32	3	7 73 119	2		A
A-OKP-A-9	A-OKP-B-32	3	7 73 119	2		A
A-OKP-B-1	A-OKP-B-32	3	7 73 119	2		A
A-OKP-B-10	A-OKP-B-32	3	7 73 119	2		A
A-OKP-B-11	A-OKP-B-32	3	7 73 119	2		A
A-OKP-B-13	A-OKP-B-32	3	7 73 119	2		A
A-OKP-B-15	A-OKP-B-32	3	7 73 119	2		A
A-OKP-B-16	A-OKP-B-32	3	7 73 119	2		A
A-OKP-B-17	A-OKP-B-32	3	7 73 119	2		A
A-OKP-B-18	A-OKP-B-32	3	7 73 119	2		A
A-OKP-B-19	A-OKP-B-32	3	7 73 119	2		A
A-OKP-B-2	A-OKP-B-32	3	7 73 119	2		A
A-OKP-B-20	A-OKP-B-32	3	7 73 119	2		A
A-OKP-B-21	A-OKP-B-32	3	7 73 119	2		A
A-OKP-B-22	A-OKP-B-32	3	7 73 119	2		A
A-OKP-B-23	A-OKP-B-32	2	73 119	2		A
A-OKP-B-24	A-OKP-B-32	3	7 73 119	2		A
A-OKP-B-25	A-OKP-B-32	3	7 73 119	2		A
A-OKP-B-26	A-OKP-B-32	3	7 73 119	2		A
A-OKP-B-27	A-OKP-B-32	3	7 73 119	2		A
A-OKP-B-28	A-OKP-B-32	3	7 73 119	2		A
A-OKP-B-29	A-OKP-B-32	3	7 73 119	2		A
A-OKP-B-3	A-OKP-B-32	3	7 73 119	2		A
A-OKP-B-30	A-OKP-B-32	3	7 73 119	2		A
A-OKP-B-31	A-OKP-B-32	3	7 73 119	2		A
A-OKP-B-32	A-OKP-B-32	3	7 73 119	2		A
A-OKP-B-33	A-OKP-B-32	3	7 73 119	2		A
A-OKP-B-34	A-OKP-B-32	3	7 73 119	2		A
A-OKP-B-35	A-OKP-B-32	3	7 73 119	2		A
A-OKP-B-36	A-OKP-B-32	3	7 73 119	2		A
A-OKP-B-37	A-OKP-B-32	3	7 73 119	2		A
A-OKP-B-38	A-OKP-B-32	3	7 73 119	2		A
A-OKP-B-39	A-OKP-B-32	3	7 73 119	2		A
A-OKP-B-4	A-OKP-B-32	3	7 73 119	2		A
A-OKP-B-40	A-OKP-B-32	3	7 73 119	2		A
A-OKP-B-41	A-OKP-B-32	3	7 73 119	2		A
A-OKP-B-42	A-OKP-B-32	3	7 73 119	2		A
A-OKP-B-43	A-OKP-B-32	3	7 73 119	2		A
A-OKP-B-44	A-OKP-B-32	3	7 73 119	2		A
A-OKP-B-45	A-OKP-B-32	3	7 73 119	2		A
A-OKP-B-46	A-OKP-B-32	3	7 73 119	2		A
A-OKP-B-47	A-OKP-B-32	3	7 73 119	2		A
A-OKP-B-48	A-OKP-B-32	3	7 73 119	2		A
A-OKP-B-49	A-OKP-B-32	3	7 73 119	2		A
A-OKP-B-5	A-OKP-B-32	3	7 73 119	2		A
A-OKP-B-6	A-OKP-B-32	3	7 73 119	2		A
A-OKP-B-7	A-OKP-B-32	3	7 73 119	2		A
A-OKP-B-8	A-OKP-B-32	3	7 73 119	2		A
A-OKP-B-9	A-OKP-B-32	3	7 73 119	2		A
A-OKP-B-P2	A-OKP-B-32	3	1 67 113	2		A
A-OKP-C-1	A-SHV-100	3	7 73 119	2		A
A-OKP-D-1	A-OKP-D-1	4	7 14 73 119	2		A
A-ORF6-1	A-ORF6-1	2	78 134	2		A
A-ORN-1	A-ORN-5	2	73 119	2		A
A-ORN-2	A-ORN-5	2	73 119	2		A
A-ORN-3	A-ORN-5	3	57 73 119	3		A
A-ORN-4	A-ORN-5	2	73 119	2		A
A-ORN-5	A-ORN-5	2	73 119	2		A
A-ORN-6	A-ORN-5	2	73 119	2		A
A-OXY-1-1	A-OXY-1-7	1	72	1		A
A-OXY-1-2	A-OXY-1-7	1	72	1		A
A-OXY-1-3	A-OXY-1-7	1	72	1		A
A-OXY-1-4	A-OXY-1-7	1	71	1		A
A-OXY-1-6	A-OXY-1-7	1	72	1		A
A-OXY-1-7	A-OXY-1-7	1	72	1		A
A-OXY-1-8	A-OXY-1-7	1	71	1		A
A-OXY-1-9	A-OXY-1-7	1	72	1		A
A-OXY-2-1	A-OXY-2-14	1	71	1		A
A-OXY-2-10	A-OXY-2-14	1	71	1		A
A-OXY-2-11	A-OXY-2-14	1	71	1		A
A-OXY-2-12	A-OXY-2-14	1	71	1		A
A-OXY-2-13	A-OXY-2-14	1	71	1		A
A-OXY-2-14	A-OXY-2-14	1	71	1		A
A-OXY-2-15	A-OXY-2-14	1	71	1		A
A-OXY-2-16	A-OXY-2-14	1	71	1		A
A-OXY-2-17	A-OXY-2-14	1	71	1		A
A-OXY-2-18	A-OXY-2-14	1	71	1		A
A-OXY-2-19	A-OXY-2-14	1	71	1		A
A-OXY-2-2	A-OXY-2-14	1	71	1		A
A-OXY-2-20	A-OXY-2-14	1	71	1		A
A-OXY-2-3	A-OXY-2-14	1	70	1		A
A-OXY-2-4	A-OXY-2-14	1	70	1		A
A-OXY-2-6	A-OXY-2-14	1	71	1		A
A-OXY-2-7	A-OXY-2-14	1	71	1		A
A-OXY-2-8	A-OXY-2-14	1	71	1		A
A-OXY-2-9	A-OXY-2-14	1	70	1		A
A-OXY-2-b	A-OXY-2-14	1	71	1		A
A-OXY-3-1	A-OXY-9-1	2	21 69	1		A
A-OXY-3-2	A-OXY-9-1	2	21 69	1		A
A-OXY-3-3	A-OXY-9-1	2	21 69	1		A
A-OXY-4-1	A-OXY-1-7	1	71	1		A
A-OXY-4-2	A-OXY-1-7	1	71	1		A
A-OXY-4-3	A-OXY-1-7	1	71	1		A
A-OXY-4-4	A-OXY-1-7	1	71	1		A
A-OXY-4-5	A-OXY-1-7	1	71	1		A
A-OXY-5-1	A-OXY-1-7	1	71	1		A
A-OXY-5-2	A-OXY-1-7	1	71	1		A
A-OXY-5-3	A-OXY-1-7	1	71	1		A
A-OXY-6-1	A-OXY-1-7	1	72	1		A
A-OXY-6-2	A-OXY-1-7	1	71	1		A
A-OXY-6-3	A-OXY-1-7	1	72	1		A
A-OXY-6-4	A-OXY-1-7	1	72	1		A
A-OXY-7-1	A-OXY-1-7	1	71	1		A
A-OXY-8-1	A-OXY-9-1	2	21 71	1		A
A-OXY-8-2	A-OXY-9-1	3	4 21 71	1		A
A-OXY-8-3	A-OXY-9-1	2	21 71	1		A
A-OXY-9-1	A-OXY-9-1	2	21 69	1		A
A-PAD-1	A-PAD-1	3	75 130 273	3		A
A-PAL-1	A-PAL-8	2	71 117	2		A
A-PAL-2	A-PAL-4	2	71 117	2		A
A-PAL-3	A-PAL-4	2	71 117	2		A
A-PAL-4	A-PAL-4	2	71 117	2		A
A-PAL-5	A-PAL-4	2	71 117	2		A
A-PAL-6	A-PAL-4	2	71 117	2		A
A-PAL-7	A-PAL-4	2	71 117	2		A
A-PAL-8	A-PAL-8	5	21 23 43 72 118	3		A
A-PAU-1	A-PAU-1	1	128	1		A
A-PC1-1	A-PC1-7	1	17	0		A
A-PC1-2	A-PC1-7	2	17 220	1		A
A-PC1-3	A-PC1-7	1	17	0		A
A-PC1-4	A-PC1-7	1	17	0		A
A-PC1-5	A-PC1-7	1	17	0		A
A-PC1-6	A-PC1-7	1	17	0		A
A-PC1-7	A-PC1-7	1	17	0		A
A-PC2-1	A-PC2-1	1	17	0		A
A-PC2-2	A-PC2-2	1	17	0		A
A-PenA	A-PenA	4	26 61 82 136	3		A
A-PenB-1	A-PenB-3	4	26 71 92 146	3		A
A-PenB-2	A-PenB-3	4	26 71 92 146	3		A
A-PenB-3	A-PenB-3	4	26 71 92 146	3		A
A-PenB-4	A-PenB-3	4	26 71 92 146	3		A
A-PenB-5	A-PenB-5	4	26 71 92 146	3		A
A-PenE	A-PenE	4	26 56 77 131	3		A
A-PenP-1	A-PenP-1	2	21 27	0		A
A-PenP-2	A-PenP-1	2	21 27	0		A
A-PenP-P1	A-PenP-1	0		0		A
A-PER-1	A-PER-4	1	140	1		A
A-PER-10	A-PER-4	1	140	1		A
A-PER-11	A-PER-4	1	140	1		A
A-PER-12	A-PER-4	1	140	1		A
A-PER-13	A-PER-4	1	140	1		A
A-PER-14	A-PER-14	2	7 140	1		A
A-PER-15	A-PER-4	1	140	1		A
A-PER-16	A-PER-4	1	140	1		A
A-PER-2	A-PER-14	2	7 140	1		A
A-PER-3	A-PER-4	1	140	1		A
A-PER-4	A-PER-4	1	140	1		A
A-PER-5	A-PER-4	1	140	1		A
A-PER-6	A-PER-14	1	140	1		A
A-PER-7	A-PER-4	1	140	1		A
A-PER-8	A-PER-4	1	140	1		A
A-PER-9	A-PER-4	1	140	1		A
A-PLA-1	A-ORN-5	2	73 119	2		A
A-PLA-2a	A-ORN-5	2	73 119	2		A
A-PLA-3	A-ORN-5	2	73 119	2		A
A-PLA-6	A-ORN-5	2	73 119	2		A
A-PLES-1	A-PLES-6	3	18 85 131	2		A
A-PLES-2	A-PLES-6	3	18 85 131	2		A
A-PLES-3	A-PLES-6	3	18 85 131	2		A
A-PLES-4	A-PLES-6	3	18 85 131	2		A
A-PLES-5	A-PLES-6	3	18 85 131	2		A
A-PLES-6	A-PLES-6	3	18 85 131	2		A
A-PLES-7	A-PLES-6	3	18 85 131	2		A
A-PLES-8	A-PLES-6	3	18 85 131	2		A
A-PLES-9	A-PLES-6	3	18 85 131	2		A
A-PME-1	A-PME-1	2	24 77	1		A
A-PSV-1	A-PSV-1	4	9 17 81 127	2		A
A-R39-1	A-R39-1	1	25	0		A
A-RAHN-1	A-RAHN-1	1	76	1		A
A-RAHN-2	A-RAHN-1	1	76	1		A
A-RCP-1	A-RCP-1	2	81 127	2		A
A-REUT	A-REUT	3	42 92 146	3		A
A-RIC-1	A-RIC-1	3	76 103 116	3		A
A-RIC-2	A-RIC-1	1	76	1		A
A-ROB-1	A-ROB-12	2	18 137	1		A
A-ROB-10	A-ROB-12	2	18 137	1		A
A-ROB-11	A-ROB-12	2	18 137	1		A
A-ROB-12	A-ROB-12	2	23 142	1		A
A-ROB-2	A-ROB-12	2	18 137	1		A
A-ROB-3	A-ROB-12	2	20 139	1		A
A-ROB-4	A-ROB-12	2	20 139	1		A
A-ROB-5	A-ROB-12	2	18 137	1		A
A-ROB-6	A-ROB-12	2	18 137	1		A
A-ROB-7	A-ROB-12	2	18 137	1		A
A-ROB-8	A-ROB-12	2	18 137	1		A
A-ROB-9	A-ROB-12	2	18 137	1		A
A-RPA-1	A-RPA-1	3	35 70 124	3		A
A-RSA2-1	A-RSA2-1	4	7 10 99 142	2		A
A-RUB-1	A-RUB-1	3	7 73 119	2		A
A-SCO-1	A-SCO-1	2	78 121	2		A
A-SDA-A-1	A-SDA-A-1	3	88 148 158	3		A
A-SDA-D-1	A-SDA-D-1	3	25 42 155	2		A
A-SDA-D-2	A-SDA-D-3	2	25 155	1		A
A-SDA-D-3	A-SDA-D-3	2	25 155	1		A
A-SDA-E-1	A-SDA-E-1	4	85 141 151 170	4		A
A-SDA-F-1	A-SDA-F-2	2	139 168	2		A
A-SDA-F-2	A-SDA-F-2	2	139 168	2		A
A-SDA-G-1	A-SDA-G-1	3	28 95 147	2		A
A-SDA-L-1	A-SDA-L-1	4	81 139 144 168	4		A
A-SED-1	A-SED-1	1	76	1		A
A-SFC-1	A-SFC-1	2	73 243	2		A
A-SFO-1	A-FONA-6	1	76	1		A
A-SGM-1	A-SGM-1	2	94 263	2		A
A-SGM-2	A-SGM-2	2	82 251	2		A
A-SGM-3	A-SGM-2	2	82 251	2		A
A-SGM-4	A-SGM-4	2	82 251	2		A
A-SGM-5	A-SGM-5	3	15 99 268	2		A
A-SGM-6	A-SGM-5	3	15 99 268	2		A
A-SGM-7	A-SGM-5	3	15 99 268	2		A
A-SHV-1	A-SHV-100	3	7 73 119	2		A
A-SHV-10	A-SHV-100	3	7 72 118	2		A
A-SHV-100	A-SHV-100	3	7 86 132	2		A
A-SHV-101	A-SHV-100	3	7 73 119	2		A
A-SHV-102	A-SHV-100	3	7 73 119	2		A
A-SHV-103	A-SHV-100	3	7 73 119	2		A
A-SHV-104	A-SHV-100	3	7 73 119	2		A
A-SHV-105	A-SHV-100	3	7 73 119	2		A
A-SHV-106	A-SHV-100	3	7 73 119	2		A
A-SHV-107	A-SHV-100	3	7 73 119	2		A
A-SHV-108	A-SHV-100	3	7 73 119	2		A
A-SHV-109	A-SHV-100	3	7 73 119	2		A
A-SHV-11	A-SHV-100	3	7 73 119	2		A
A-SHV-110	A-SHV-100	3	7 73 119	2		A
A-SHV-111	A-SHV-100	3	7 73 119	2		A
A-SHV-113	A-SHV-100	3	7 73 119	2		A
A-SHV-114	A-SHV-100	3	7 73 119	2		A
A-SHV-115	A-SHV-100	3	7 73 119	2		A
A-SHV-116	A-SHV-100	3	7 73 119	2		A
A-SHV-117	A-SHV-100	3	7 73 119	2		A
A-SHV-119	A-SHV-100	3	7 73 119	2		A
A-SHV-12	A-SHV-100	3	7 73 119	2		A
A-SHV-120	A-SHV-100	3	7 73 119	2		A
A-SHV-121	A-SHV-100	3	7 73 119	2		A
A-SHV-122	A-SHV-100	3	7 73 119	2		A
A-SHV-128	A-SHV-100	2	7 73	1		A
A-SHV-129	A-SHV-100	3	7 73 119	2		A
A-SHV-13	A-SHV-100	3	7 73 119	2		A
A-SHV-132	A-SHV-100	3	7 73 119	2		A
A-SHV-133	A-SHV-100	3	7 73 119	2		A
A-SHV-134	A-SHV-100	3	7 73 119	2		A
A-SHV-135	A-SHV-100	3	7 73 119	2		A
A-SHV-137	A-SHV-100	3	7 73 119	2		A
A-SHV-14	A-SHV-100	3	7 73 119	2		A
A-SHV-141	A-SHV-100	3	7 73 119	2		A
A-SHV-142	A-SHV-100	3	7 73 119	2		A
A-SHV-143	A-SHV-100	3	7 73 119	2		A
A-SHV-144	A-SHV-100	3	7 73 119	2		A
A-SHV-145	A-SHV-100	3	7 73 119	2		A
A-SHV-146	A-SHV-100	3	7 73 119	2		A
A-SHV-147	A-SHV-100	3	7 73 119	2		A
A-SHV-148	A-SHV-100	3	7 73 119	2		A
A-SHV-149	A-SHV-100	3	7 73 119	2		A
A-SHV-15	A-SHV-100	3	7 73 119	2		A
A-SHV-150	A-SHV-100	3	7 73 119	2		A
A-SHV-151	A-SHV-100	3	7 73 119	2		A
A-SHV-152	A-SHV-100	3	7 73 119	2		A
A-SHV-153	A-SHV-100	3	7 73 119	2		A
A-SHV-154	A-SHV-100	3	7 73 119	2		A
A-SHV-155	A-SHV-100	3	7 73 119	2		A
A-SHV-156	A-SHV-100	3	7 73 119	2		A
A-SHV-157	A-SHV-100	3	7 73 119	2		A
A-SHV-158	A-SHV-100	3	7 73 119	2		A
A-SHV-159	A-SHV-100	3	7 73 119	2		A
A-SHV-16	A-SHV-100	3	7 73 119	2		A
A-SHV-160	A-SHV-100	3	7 73 119	2		A
A-SHV-161	A-SHV-100	3	7 73 119	2		A
A-SHV-162	A-SHV-100	3	7 73 119	2		A
A-SHV-163	A-SHV-100	3	7 73 119	2		A
A-SHV-164	A-SHV-100	3	7 73 119	2		A
A-SHV-165	A-SHV-100	3	7 73 119	2		A
A-SHV-168	A-SHV-100	3	7 73 119	2		A
A-SHV-169	A-SHV-100	3	7 73 119	2		A
A-SHV-170	A-SHV-100	3	7 73 119	2		A
A-SHV-171	A-SHV-100	3	7 73 119	2		A
A-SHV-172	A-SHV-100	3	7 73 119	2		A
A-SHV-173	A-SHV-100	3	7 73 119	2		A
A-SHV-175	A-SHV-100	3	7 73 119	2		A
A-SHV-176	A-SHV-100	2	7 73	1		A
A-SHV-177	A-SHV-100	2	7 73	1		A
A-SHV-178	A-SHV-100	3	7 73 119	2		A
A-SHV-179	A-SHV-100	3	7 73 119	2		A
A-SHV-18	A-SHV-100	3	7 73 119	2		A
A-SHV-180	A-SHV-100	3	7 73 119	2		A
A-SHV-181	A-SHV-100	3	7 73 119	2		A
A-SHV-182	A-SHV-100	3	7 73 119	2		A
A-SHV-183	A-SHV-100	3	7 73 119	2		A
A-SHV-184	A-SHV-100	3	7 73 119	2		A
A-SHV-185	A-SHV-100	3	7 73 119	2		A
A-SHV-186	A-SHV-100	4	7 73 119 237	3		A
A-SHV-187	A-SHV-100	3	9 75 121	2		A
A-SHV-188	A-SHV-100	3	9 75 121	2		A
A-SHV-189	A-SHV-100	3	7 73 119	2		A
A-SHV-190	A-SHV-100	3	7 73 119	2		A
A-SHV-191	A-SHV-100	3	7 73 119	2		A
A-SHV-193	A-SHV-100	3	7 73 119	2		A
A-SHV-194	A-SHV-100	3	7 73 119	2		A
A-SHV-195	A-SHV-100	3	7 73 119	2		A
A-SHV-196	A-SHV-100	3	7 73 119	2		A
A-SHV-197	A-SHV-100	3	7 73 119	2		A
A-SHV-198	A-SHV-100	3	7 73 119	2		A
A-SHV-199	A-SHV-100	3	7 73 119	2		A
A-SHV-1b-b	A-SHV-100	3	7 73 119	2		A
A-SHV-2	A-SHV-100	3	7 73 119	2		A
A-SHV-200	A-SHV-100	3	7 73 119	2		A
A-SHV-201	A-SHV-100	3	7 73 119	2		A
A-SHV-202	A-SHV-100	3	9 75 121	2		A
A-SHV-203	A-SHV-100	3	7 73 119	2		A
A-SHV-204	A-SHV-100	3	7 73 119	2		A
A-SHV-205	A-SHV-100	3	7 73 119	2		A
A-SHV-206	A-SHV-100	3	7 73 119	2		A
A-SHV-207	A-SHV-100	3	7 73 119	2		A
A-SHV-208	A-SHV-100	3	7 73 119	2		A
A-SHV-209	A-SHV-100	3	7 73 119	2		A
A-SHV-210	A-SHV-100	3	7 73 119	2		A
A-SHV-211	A-SHV-100	3	7 73 119	2		A
A-SHV-212	A-SHV-100	3	7 73 119	2		A
A-SHV-213	A-SHV-100	3	7 73 119	2		A
A-SHV-214	A-SHV-100	3	7 73 119	2		A
A-SHV-215	A-SHV-100	3	7 73 119	2		A
A-SHV-216	A-SHV-100	3	7 73 119	2		A
A-SHV-217	A-SHV-100	3	7 73 119	2		A
A-SHV-218	A-SHV-100	3	7 73 119	2		A
A-SHV-219	A-SHV-100	3	7 73 119	2		A
A-SHV-220	A-SHV-100	3	7 73 119	2		A
A-SHV-221	A-SHV-100	2	73 119	2		A
A-SHV-222	A-SHV-100	3	7 73 119	2		A
A-SHV-223	A-SHV-100	3	7 73 119	2		A
A-SHV-224	A-SHV-100	3	7 73 119	2		A
A-SHV-225	A-SHV-100	3	7 73 119	2		A
A-SHV-226	A-SHV-100	3	7 73 119	2		A
A-SHV-227	A-SHV-100	3	7 73 119	2		A
A-SHV-228	A-SHV-100	3	7 73 119	2		A
A-SHV-24	A-SHV-100	3	7 73 119	2		A
A-SHV-25	A-SHV-100	3	7 73 119	2		A
A-SHV-26	A-SHV-100	3	7 73 119	2		A
A-SHV-27	A-SHV-100	3	7 73 119	2		A
A-SHV-28	A-SHV-100	3	7 73 119	2		A
A-SHV-29	A-SHV-100	3	7 73 119	2		A
A-SHV-2a	A-SHV-100	3	7 73 119	2		A
A-SHV-3	A-SHV-100	3	7 73 119	2		A
A-SHV-30	A-SHV-100	3	7 73 119	2		A
A-SHV-31	A-SHV-100	3	7 73 119	2		A
A-SHV-32	A-SHV-100	3	7 73 119	2		A
A-SHV-33	A-SHV-100	3	7 73 119	2		A
A-SHV-34	A-SHV-100	3	7 73 119	2		A
A-SHV-35	A-SHV-100	3	7 73 119	2		A
A-SHV-36	A-SHV-100	3	7 73 119	2		A
A-SHV-37	A-SHV-100	3	7 73 119	2		A
A-SHV-38	A-SHV-100	3	7 73 119	2		A
A-SHV-4	A-SHV-100	3	7 73 119	2		A
A-SHV-40	A-SHV-100	3	7 73 119	2		A
A-SHV-41	A-SHV-100	3	7 73 119	2		A
A-SHV-42	A-SHV-100	3	7 73 119	2		A
A-SHV-43	A-SHV-100	3	7 73 119	2		A
A-SHV-44	A-SHV-100	3	7 73 119	2		A
A-SHV-45	A-SHV-100	3	7 73 119	2		A
A-SHV-46	A-SHV-100	3	7 73 119	2		A
A-SHV-48	A-SHV-100	3	7 73 119	2		A
A-SHV-49	A-SHV-100	3	7 73 119	2		A
A-SHV-5	A-SHV-100	3	7 73 119	2		A
A-SHV-50	A-SHV-100	3	7 73 119	2		A
A-SHV-51	A-SHV-100	3	7 73 119	2		A
A-SHV-52	A-SHV-100	3	7 73 119	2		A
A-SHV-55	A-SHV-100	3	7 73 119	2		A
A-SHV-56	A-SHV-100	3	7 73 119	2		A
A-SHV-57	A-SHV-100	3	7 73 119	2		A
A-SHV-59	A-SHV-100	3	7 73 119	2		A
A-SHV-6		0		0		A
A-SHV-60	A-SHV-100	3	7 73 119	2		A
A-SHV-61	A-SHV-100	3	7 73 119	2		A
A-SHV-62	A-SHV-100	3	7 73 119	2		A
A-SHV-63	A-SHV-100	3	7 73 119	2		A
A-SHV-64	A-SHV-100	3	7 73 119	2		A
A-SHV-65	A-SHV-100	3	7 73 119	2		A
A-SHV-66	A-SHV-100	3	7 73 119	2		A
A-SHV-67	A-SHV-100	4	7 57 73 119	3		A
A-SHV-69	A-SHV-100	3	7 73 119	2		A
A-SHV-7	A-SHV-100	3	7 73 119	2		A
A-SHV-70	A-SHV-100	3	7 73 119	2		A
A-SHV-71	A-SHV-100	3	7 73 119	2		A
A-SHV-72	A-SHV-100	3	7 73 119	2		A
A-SHV-73	A-SHV-100	3	6 72 118	2		A
A-SHV-74	A-SHV-100	3	7 73 119	2		A
A-SHV-75	A-SHV-100	3	7 73 119	2		A
A-SHV-76	A-SHV-100	3	7 73 119	2		A
A-SHV-77	A-SHV-100	3	7 73 119	2		A
A-SHV-78	A-SHV-100	3	7 73 119	2		A
A-SHV-79	A-SHV-100	3	7 73 119	2		A
A-SHV-8	A-SHV-100	3	7 73 119	2		A
A-SHV-80	A-SHV-100	3	7 73 119	2		A
A-SHV-81	A-SHV-100	3	7 73 119	2		A
A-SHV-82	A-SHV-100	3	7 73 119	2		A
A-SHV-85	A-SHV-100	3	7 73 119	2		A
A-SHV-86	A-SHV-100	3	7 73 119	2		A
A-SHV-89	A-SHV-100	3	7 73 119	2		A
A-SHV-9	A-SHV-100	3	7 72 118	2		A
A-SHV-90	A-SHV-100	3	7 73 119	2		A
A-SHV-91	A-SHV-100	3	7 73 119	2		A
A-SHV-92	A-SHV-100	3	7 73 119	2		A
A-SHV-93	A-SHV-100	3	7 73 119	2		A
A-SHV-94	A-SHV-100	3	7 73 119	2		A
A-SHV-95	A-SHV-100	3	7 73 119	2		A
A-SHV-96	A-SHV-100	3	7 73 119	2		A
A-SHV-97	A-SHV-100	3	7 73 119	2		A
A-SHV-98	A-SHV-100	3	7 73 119	2		A
A-SHV-99	A-SHV-100	3	7 73 119	2		A
A-SHV-P1	A-SHV-100	3	7 73 119	2		A
A-SHV-P10	A-SHV-100	2	73 119	2		A
A-SHV-P11	A-SHV-100	3	7 73 119	2		A
A-SHV-P13	A-SHV-100	3	7 73 119	2		A
A-SHV-P17	A-SHV-100	2	63 109	2		A
A-SHV-P2	A-SHV-100	0		0		A
A-SHV-P29	A-SHV-100	3	7 73 119	2		A
A-SHV-P3	A-SHV-100	0		0		A
A-SHV-P35	A-SHV-100	2	66 112	2		A
A-SHV-P44	A-SHV-100	2	63 109	2		A
A-SHV-P46	A-SHV-100	2	63 109	2		A
A-SHV-P47	A-SHV-100	3	7 73 119	2		A
A-SHV-P53	A-SHV-100	2	63 109	2		A
A-SHV-P54	A-SHV-100	2	63 109	2		A
A-SHV-P7	A-SHV-100	3	7 73 119	2		A
A-SHV-P9	A-SHV-100	2	63 109	2		A
A-SME-1	A-SME-3	3	17 72 242	2		A
A-SME-2	A-SME-3	3	17 72 242	2		A
A-SME-3	A-SME-3	3	17 72 242	2		A
A-SME-4	A-SME-3	3	17 72 242	2		A
A-SME-5	A-SME-3	3	17 72 242	2		A
A-SMO-1	A-SMO-1	1	76	1		A
A-TEM-1	A-TEM-181	3	18 75 121	2		A
A-TEM-10	A-TEM-181	3	18 75 121	2		A
A-TEM-101	A-TEM-181	3	18 75 121	2		A
A-TEM-102	A-TEM-181	3	18 75 121	2		A
A-TEM-103	A-TEM-181	3	18 75 121	2		A
A-TEM-104	A-TEM-181	3	18 75 121	2		A
A-TEM-105	A-TEM-181	3	18 75 121	2		A
A-TEM-106	A-TEM-181	3	18 75 121	2		A
A-TEM-107	A-TEM-181	3	18 75 121	2		A
A-TEM-108	A-TEM-181	3	18 75 121	2		A
A-TEM-109	A-TEM-181	3	18 75 121	2		A
A-TEM-11	A-TEM-181	3	18 75 121	2		A
A-TEM-110	A-TEM-181	3	18 75 121	2		A
A-TEM-111	A-TEM-181	3	18 75 121	2		A
A-TEM-112	A-TEM-181	3	18 75 121	2		A
A-TEM-113	A-TEM-181	3	18 75 121	2		A
A-TEM-114	A-TEM-181	3	18 75 121	2		A
A-TEM-115	A-TEM-181	3	18 75 121	2		A
A-TEM-116	A-TEM-181	3	18 75 121	2		A
A-TEM-117	A-TEM-181	3	18 75 121	2		A
A-TEM-12	A-TEM-181	3	18 75 121	2		A
A-TEM-120	A-TEM-181	3	18 75 121	2		A
A-TEM-121	A-TEM-181	3	18 75 121	2		A
A-TEM-122	A-TEM-181	3	18 75 121	2		A
A-TEM-123	A-TEM-181	3	18 75 121	2		A
A-TEM-124	A-TEM-181	3	18 75 121	2		A
A-TEM-125	A-TEM-181	3	18 75 121	2		A
A-TEM-126	A-TEM-181	3	18 75 121	2		A
A-TEM-127	A-TEM-181	3	18 75 121	2		A
A-TEM-128	A-TEM-181	3	18 75 121	2		A
A-TEM-129	A-TEM-181	3	18 75 121	2		A
A-TEM-13	A-TEM-181	3	18 75 121	2		A
A-TEM-130	A-TEM-181	3	18 75 121	2		A
A-TEM-131	A-TEM-181	3	18 75 121	2		A
A-TEM-132	A-TEM-181	3	18 75 121	2		A
A-TEM-133	A-TEM-181	3	18 75 121	2		A
A-TEM-134	A-TEM-181	3	18 75 121	2		A
A-TEM-135	A-TEM-181	3	18 75 121	2		A
A-TEM-136	A-TEM-181	3	18 75 121	2		A
A-TEM-137	A-TEM-181	3	18 75 121	2		A
A-TEM-138	A-TEM-181	3	18 75 121	2		A
A-TEM-139	A-TEM-181	3	18 75 121	2		A
A-TEM-141	A-TEM-181	3	18 75 121	2		A
A-TEM-142	A-TEM-181	3	18 75 121	2		A
A-TEM-143	A-TEM-181	4	18 75 121 162	3		A
A-TEM-144	A-TEM-181	4	18 75 121 162	3		A
A-TEM-145	A-TEM-181	3	18 75 121	2		A
A-TEM-146	A-TEM-181	3	18 75 121	2		A
A-TEM-147	A-TEM-181	3	18 75 121	2		A
A-TEM-148	A-TEM-181	3	18 75 121	2		A
A-TEM-149	A-TEM-181	3	18 75 121	2		A
A-TEM-15	A-TEM-181	3	18 75 121	2		A
A-TEM-150	A-TEM-181	3	18 75 121	2		A
A-TEM-151	A-TEM-181	3	18 75 121	2		A
A-TEM-152	A-TEM-181	3	18 75 121	2		A
A-TEM-153	A-TEM-181	3	18 75 121	2		A
A-TEM-154	A-TEM-181	3	18 75 121	2		A
A-TEM-155	A-TEM-181	3	18 75 121	2		A
A-TEM-156	A-TEM-181	3	18 75 121	2		A
A-TEM-157	A-TEM-181	3	18 75 121	2		A
A-TEM-158	A-TEM-181	3	18 75 121	2		A
A-TEM-159	A-TEM-181	3	18 75 121	2		A
A-TEM-16	A-TEM-181	3	18 75 121	2		A
A-TEM-160	A-TEM-181	3	18 75 121	2		A
A-TEM-161	A-TEM-181	3	18 75 121	2		A
A-TEM-162	A-TEM-181	3	18 75 121	2		A
A-TEM-163	A-TEM-181	3	18 75 121	2		A
A-TEM-164	A-TEM-181	3	18 75 121	2		A
A-TEM-165	A-TEM-181	3	18 75 121	2		A
A-TEM-166	A-TEM-181	3	18 75 121	2		A
A-TEM-167	A-TEM-181	3	18 75 121	2		A
A-TEM-168	A-TEM-181	3	18 75 121	2		A
A-TEM-169	A-TEM-181	3	18 75 121	2		A
A-TEM-17	A-TEM-181	3	18 75 121	2		A
A-TEM-170	A-TEM-181	4	18 75 121 279	3		A
A-TEM-171	A-TEM-181	3	18 75 121	2		A
A-TEM-172	A-TEM-181	3	18 75 121	2		A
A-TEM-173	A-TEM-181	3	18 75 121	2		A
A-TEM-174	A-TEM-181	3	18 75 121	2		A
A-TEM-176	A-TEM-181	3	18 75 121	2		A
A-TEM-177	A-TEM-181	3	18 75 121	2		A
A-TEM-178	A-TEM-181	3	18 75 121	2		A
A-TEM-18	A-TEM-181	3	18 75 121	2		A
A-TEM-181	A-TEM-181	3	18 75 121	2		A
A-TEM-182	A-TEM-181	3	18 75 121	2		A
A-TEM-183	A-TEM-181	3	18 75 121	2		A
A-TEM-184	A-TEM-181	3	18 75 121	2		A
A-TEM-185	A-TEM-181	3	18 75 121	2		A
A-TEM-186	A-TEM-181	3	18 75 121	2		A
A-TEM-187	A-TEM-181	3	18 75 121	2		A
A-TEM-188	A-TEM-181	3	18 75 121	2		A
A-TEM-189	A-TEM-181	3	18 75 121	2		A
A-TEM-19	A-TEM-181	3	18 75 121	2		A
A-TEM-190	A-TEM-181	3	18 75 121	2		A
A-TEM-191	A-TEM-181	3	18 75 121	2		A
A-TEM-193	A-TEM-181	4	18 75 121 162	3		A
A-TEM-194	A-TEM-181	3	18 75 121	2		A
A-TEM-195	A-TEM-181	4	18 75 121 162	3		A
A-TEM-196	A-TEM-181	3	18 75 121	2		A
A-TEM-197	A-TEM-181	3	18 75 121	2		A
A-TEM-198	A-TEM-181	3	18 75 121	2		A
A-TEM-2	A-TEM-181	3	18 75 121	2		A
A-TEM-20	A-TEM-181	3	18 75 121	2		A
A-TEM-201	A-TEM-181	3	18 75 121	2		A
A-TEM-204	A-TEM-181	3	18 75 121	2		A
A-TEM-205	A-TEM-181	3	18 75 121	2		A
A-TEM-206	A-TEM-181	3	18 75 121	2		A
A-TEM-207	A-TEM-181	3	18 75 121	2		A
A-TEM-208	A-TEM-181	3	18 75 121	2		A
A-TEM-209	A-TEM-181	3	18 75 121	2		A
A-TEM-21	A-TEM-181	3	18 75 121	2		A
A-TEM-210	A-TEM-181	3	18 75 121	2		A
A-TEM-211	A-TEM-181	3	18 75 121	2		A
A-TEM-212	A-TEM-181	3	18 75 121	2		A
A-TEM-213	A-TEM-181	3	18 75 121	2		A
A-TEM-214	A-TEM-181	3	18 75 121	2		A
A-TEM-215	A-TEM-181	3	18 75 121	2		A
A-TEM-216	A-TEM-181	3	18 75 121	2		A
A-TEM-217	A-TEM-181	3	18 75 121	2		A
A-TEM-219	A-TEM-181	3	18 75 121	2		A
A-TEM-22	A-TEM-181	3	18 75 121	2		A
A-TEM-220	A-TEM-181	3	18 75 121	2		A
A-TEM-224	A-TEM-181	3	18 75 121	2		A
A-TEM-225	A-TEM-181	3	18 75 121	2		A
A-TEM-226	A-TEM-181	3	18 75 121	2		A
A-TEM-227	A-TEM-181	3	18 75 121	2		A
A-TEM-228	A-TEM-181	3	18 75 121	2		A
A-TEM-229	A-TEM-181	3	18 75 121	2		A
A-TEM-230	A-TEM-181	3	18 75 121	2		A
A-TEM-231	A-TEM-181	3	18 75 121	2		A
A-TEM-232	A-TEM-181	3	18 75 121	2		A
A-TEM-233	A-TEM-181	3	18 75 121	2		A
A-TEM-234	A-TEM-181	3	18 75 121	2		A
A-TEM-235	A-TEM-181	3	18 75 121	2		A
A-TEM-236	A-TEM-181	4	18 75 121 162	3		A
A-TEM-237	A-TEM-181	3	18 75 121	2		A
A-TEM-238	A-TEM-181	3	18 75 121	2		A
A-TEM-24	A-TEM-181	3	18 75 121	2		A
A-TEM-240	A-TEM-181	3	18 75 121	2		A
A-TEM-241	A-TEM-181	3	18 75 121	2		A
A-TEM-242	A-TEM-181	3	18 75 121	2		A
A-TEM-243	A-TEM-181	3	18 75 121	2		A
A-TEM-25	A-TEM-181	3	18 75 121	2		A
A-TEM-26	A-TEM-181	3	18 75 121	2		A
A-TEM-27	A-TEM-181	3	18 75 121	2		A
A-TEM-28	A-TEM-181	3	18 75 121	2		A
A-TEM-29	A-TEM-181	3	18 75 121	2		A
A-TEM-3	A-TEM-181	3	18 75 121	2		A
A-TEM-30	A-TEM-181	3	18 75 121	2		A
A-TEM-31	A-TEM-181	4	18 75 121 241	3		A
A-TEM-32	A-TEM-181	3	18 75 121	2		A
A-TEM-33	A-TEM-181	3	18 75 121	2		A
A-TEM-34	A-TEM-181	3	18 75 121	2		A
A-TEM-35	A-TEM-181	3	18 75 121	2		A
A-TEM-36	A-TEM-181	3	18 75 121	2		A
A-TEM-37	A-TEM-181	3	18 75 121	2		A
A-TEM-38	A-TEM-181	3	18 75 121	2		A
A-TEM-39	A-TEM-181	3	18 75 121	2		A
A-TEM-4	A-TEM-181	3	18 75 121	2		A
A-TEM-40	A-TEM-181	3	18 75 121	2		A
A-TEM-43	A-TEM-181	3	18 75 121	2		A
A-TEM-44	A-TEM-181	3	18 75 121	2		A
A-TEM-45	A-TEM-181	3	18 75 121	2		A
A-TEM-46	A-TEM-181	3	18 75 121	2		A
A-TEM-47	A-TEM-181	3	18 75 121	2		A
A-TEM-48	A-TEM-181	3	18 75 121	2		A
A-TEM-49	A-TEM-181	3	18 75 121	2		A
A-TEM-5	A-TEM-181	3	18 75 121	2		A
A-TEM-50	A-TEM-181	3	18 75 121	2		A
A-TEM-51	A-TEM-181	3	18 75 121	2		A
A-TEM-52	A-TEM-181	3	18 75 121	2		A
A-TEM-53	A-TEM-181	3	18 75 121	2		A
A-TEM-54	A-TEM-181	3	18 75 121	2		A
A-TEM-55	A-TEM-181	3	18 75 121	2		A
A-TEM-57	A-TEM-181	3	18 75 121	2		A
A-TEM-58	A-TEM-181	3	18 75 121	2		A
A-TEM-6	A-TEM-181	3	18 75 121	2		A
A-TEM-60	A-TEM-181	4	18 75 121 221	3		A
A-TEM-61	A-TEM-181	3	18 75 121	2		A
A-TEM-63	A-TEM-181	3	18 75 121	2		A
A-TEM-65	A-TEM-181	4	18 75 121 241	3		A
A-TEM-66	A-TEM-181	3	18 75 121	2		A
A-TEM-67	A-TEM-181	4	18 75 121 241	3		A
A-TEM-68	A-TEM-181	3	18 75 121	2		A
A-TEM-7	A-TEM-181	3	18 75 121	2		A
A-TEM-70	A-TEM-181	3	18 75 121	2		A
A-TEM-71	A-TEM-181	3	18 75 121	2		A
A-TEM-72	A-TEM-181	3	18 75 121	2		A
A-TEM-73	A-TEM-181	4	18 75 121 241	3		A
A-TEM-74	A-TEM-181	3	18 75 121	2		A
A-TEM-76	A-TEM-181	3	18 75 121	2		A
A-TEM-77	A-TEM-181	3	18 75 121	2		A
A-TEM-78	A-TEM-181	3	18 75 121	2		A
A-TEM-79	A-TEM-181	3	18 75 121	2		A
A-TEM-8	A-TEM-181	3	18 75 121	2		A
A-TEM-80	A-TEM-181	3	18 75 121	2		A
A-TEM-81	A-TEM-181	3	18 75 121	2		A
A-TEM-82	A-TEM-181	3	18 75 121	2		A
A-TEM-83	A-TEM-181	4	18 75 121 163	3		A
A-TEM-84	A-TEM-181	3	18 75 121	2		A
A-TEM-85	A-TEM-181	3	18 75 121	2		A
A-TEM-86	A-TEM-181	3	18 75 121	2		A
A-TEM-87	A-TEM-181	4	18 75 121 162	3		A
A-TEM-88	A-TEM-181	3	18 75 121	2		A
A-TEM-9	A-TEM-181	3	18 75 121	2		A
A-TEM-90	A-TEM-181	3	18 75 121	2		A
A-TEM-91	A-TEM-181	4	18 75 121 162	3		A
A-TEM-92	A-TEM-181	3	18 75 121	2		A
A-TEM-93	A-TEM-181	3	18 75 121	2		A
A-TEM-94	A-TEM-181	3	18 75 121	2		A
A-TEM-95	A-TEM-181	3	18 75 121	2		A
A-TEM-96	A-TEM-181	3	18 75 121	2		A
A-TEM-97	A-TEM-181	3	18 75 121	2		A
A-TEM-98	A-TEM-181	3	18 75 121	2		A
A-TEM-99	A-TEM-181	3	18 75 121	2		A
A-TEM-P114	A-TEM-181	3	18 75 121	2		A
A-TEM-P116	A-TEM-181	3	15 72 118	2		A
A-TEM-P117	A-TEM-181	3	6 63 109	2		A
A-TEM-P118	A-TEM-181	3	6 63 109	2		A
A-TEM-P120	A-TEM-181	3	18 75 121	2		A
A-TEM-P121	A-TEM-181	3	15 72 118	2		A
A-TEM-P14	A-TEM-181	3	8 65 111	2		A
A-TER-1	A-TER-1	2	73 119	2		A
A-TER-2	A-TER-1	2	73 119	2		A
A-TLA-1	A-TLA-3	3	11 137 289	2		A
A-TLA-3	A-TLA-3	3	11 145 297	2		A
A-TLA2-1	A-TLA2-1	3	27 142 176	2		A
A-VDA-A-1	A-VDA-A-2	3	10 69 115	2		A
A-VDA-A-2	A-VDA-A-2	3	10 69 115	2		A
A-VDA-B-1	A-VDA-B-1	2	61 231	2		A
A-VDA-H-1	A-VDA-H-2	3	13 69 115	2		A
A-VDA-H-2	A-VDA-H-2	3	13 69 115	2		A
A-VEB-1	A-VEB-22	1	136	1		A
A-VEB-10	A-VEB-22	1	136	1		A
A-VEB-11	A-VEB-22	1	136	1		A
A-VEB-12	A-VEB-22	1	136	1		A
A-VEB-13	A-VEB-22	1	136	1		A
A-VEB-14	A-VEB-22	1	136	1		A
A-VEB-15	A-VEB-22	1	136	1		A
A-VEB-16	A-VEB-22	1	136	1		A
A-VEB-17	A-VEB-22	1	136	1		A
A-VEB-18	A-VEB-22	1	136	1		A
A-VEB-19	A-VEB-22	1	136	1		A
A-VEB-2	A-VEB-22	1	136	1		A
A-VEB-20	A-VEB-22	1	136	1		A
A-VEB-21	A-VEB-22	1	136	1		A
A-VEB-22	A-VEB-22	1	136	1		A
A-VEB-23	A-VEB-22	1	136	1		A
A-VEB-24	A-VEB-22	1	136	1		A
A-VEB-25	A-VEB-22	1	136	1		A
A-VEB-26	A-VEB-22	1	136	1		A
A-VEB-27	A-VEB-22	1	136	1		A
A-VEB-3	A-VEB-22	1	136	1		A
A-VEB-4	A-VEB-22	1	136	1		A
A-VEB-5	A-VEB-22	1	136	1		A
A-VEB-6	A-VEB-22	1	136	1		A
A-VEB-7	A-VEB-22	1	136	1		A
A-VEB-8	A-VEB-22	1	136	1		A
A-VEB-9	A-VEB-22	1	136	1		A
A-XCC-1	A-XCC-3	4	54 75 129 225	4		A
A-XCC-10	A-XCC-3	3	75 129 226	3		A
A-XCC-11	A-XCC-3	4	54 75 129 226	4		A
A-XCC-12	A-XCC-3	3	75 129 226	3		A
A-XCC-13	A-XCC-3	3	75 129 226	3		A
A-XCC-14	A-XCC-3	3	75 129 226	3		A
A-XCC-15	A-XCC-3	3	75 129 226	3		A
A-XCC-16	A-XCC-3	4	54 75 129 226	4		A
A-XCC-17	A-XCC-3	5	54 75 129 184 226	5		A
A-XCC-18	A-XCC-3	5	54 75 129 184 226	5		A
A-XCC-19	A-XCC-3	4	54 75 129 226	4		A
A-XCC-2	A-XCC-3	4	54 75 129 226	4		A
A-XCC-20	A-XCC-3	4	54 75 129 226	4		A
A-XCC-21	A-XCC-3	4	54 75 129 226	4		A
A-XCC-22	A-XCC-3	4	54 75 129 226	4		A
A-XCC-23	A-XCC-3	4	54 75 129 226	4		A
A-XCC-3	A-XCC-3	3	75 129 226	3		A
A-XCC-4	A-XCC-3	3	75 129 226	3		A
A-XCC-5	A-XCC-3	3	75 129 226	3		A
A-XCC-6	A-XCC-3	3	75 129 226	3		A
A-XCC-7	A-XCC-3	3	75 129 226	3		A
A-XCC-8	A-XCC-3	3	75 129 226	3		A
A-XCC-9	A-XCC-3	4	54 75 129 226	4		A
A-XCC-P1	A-XCC-3	3	47 101 198	3		A
B1-AFM-1	B1-AFM-2	2	23 205	1		B1
B1-AFM-2	B1-AFM-2	2	23 205	1		B1
B1-AFM-3	B1-AFM-2	2	23 205	1		B1
B1-ANA-1	B1-ANA-1	1	184	1		B1
B1-BcII-1	B1-BcII-118	2	12 198	1		B1
B1-BcII-10	B1-BcII-10	2	12 198	1		B1
B1-BcII-100	B1-BcII-48	2	12 198	1		B1
B1-BcII-101	B1-BcII-48	2	11 197	1		B1
B1-BcII-102	B1-BcII-48	2	11 197	1		B1
B1-BcII-103	B1-BcII-48	2	11 197	1		B1
B1-BcII-104	B1-BcII-48	2	12 198	1		B1
B1-BcII-105	B1-BcII-48	2	11 197	1		B1
B1-BcII-106	B1-BcII-118	2	12 198	1		B1
B1-BcII-107	B1-BcII-118	2	12 198	1		B1
B1-BcII-108	B1-BcII-118	2	12 198	1		B1
B1-BcII-109	B1-BcII-118	2	12 198	1		B1
B1-BcII-11	B1-BcII-13	2	12 198	1		B1
B1-BcII-110	B1-BcII-118	2	12 198	1		B1
B1-BcII-111	B1-BcII-118	2	12 198	1		B1
B1-BcII-112	B1-BcII-118	2	12 198	1		B1
B1-BcII-113	B1-BcII-118	2	19 205	1		B1
B1-BcII-114	B1-BcII-118	2	19 205	1		B1
B1-BcII-115	B1-BcII-118	2	12 198	1		B1
B1-BcII-116	B1-BcII-118	2	12 198	1		B1
B1-BcII-117	B1-BcII-118	3	12 108 198	2		B1
B1-BcII-118	B1-BcII-118	2	19 205	1		B1
B1-BcII-119	B1-BcII-118	2	12 198	1		B1
B1-BcII-12	B1-BcII-13	2	12 198	1		B1
B1-BcII-121	B1-BcII-118	3	12 108 198	2		B1
B1-BcII-122	B1-BcII-118	3	12 108 198	2		B1
B1-BcII-123	B1-BcII-118	2	12 198	1		B1
B1-BcII-124	B1-BcII-118	2	12 198	1		B1
B1-BcII-125	B1-BcII-118	2	12 198	1		B1
B1-BcII-126	B1-BcII-118	2	12 198	1		B1
B1-BcII-127	B1-BcII-118	2	12 198	1		B1
B1-BcII-128	B1-BcII-118	2	12 198	1		B1
B1-BcII-129	B1-BcII-118	2	19 205	1		B1
B1-BcII-13	B1-BcII-13	2	12 198	1		B1
B1-BcII-130	B1-BcII-118	2	12 198	1		B1
B1-BcII-131	B1-BcII-118	2	12 198	1		B1
B1-BcII-132	B1-BcII-118	2	12 198	1		B1
B1-BcII-133	B1-BcII-118	2	12 198	1		B1
B1-BcII-134	B1-BcII-118	2	12 198	1		B1
B1-BcII-135	B1-BcII-118	2	19 205	1		B1
B1-BcII-136	B1-BcII-118	2	12 198	1		B1
B1-BcII-137	B1-BcII-118	2	12 198	1		B1
B1-BcII-138	B1-BcII-118	2	12 198	1		B1
B1-BcII-139	B1-BcII-118	2	12 198	1		B1
B1-BcII-14	B1-BcII-118	2	12 198	1		B1
B1-BcII-140	B1-BcII-118	2	19 205	1		B1
B1-BcII-141	B1-BcII-118	3	12 14 198	1		B1
B1-BcII-142	B1-BcII-118	2	12 198	1		B1
B1-BcII-143	B1-BcII-118	2	12 198	1		B1
B1-BcII-144	B1-BcII-118	2	12 198	1		B1
B1-BcII-145	B1-BcII-48	2	11 205	1		B1
B1-BcII-146	B1-BcII-48	2	12 198	1		B1
B1-BcII-147	B1-BcII-48	2	12 198	1		B1
B1-BcII-148	B1-BcII-48	2	12 198	1		B1
B1-BcII-149	B1-BcII-48	2	12 198	1		B1
B1-BcII-15	B1-BcII-48	2	12 198	1		B1
B1-BcII-150	B1-BcII-48	2	12 198	1		B1
B1-BcII-151	B1-BcII-48	2	11 197	1		B1
B1-BcII-152	B1-BcII-48	2	11 197	1		B1
B1-BcII-153	B1-BcII-48	2	12 198	1		B1
B1-BcII-154	B1-BcII-48	2	12 198	1		B1
B1-BcII-155	B1-BcII-118	3	12 108 198	2		B1
B1-BcII-156	B1-BcII-118	2	12 198	1		B1
B1-BcII-157	B1-BcII-118	2	12 198	1		B1
B1-BcII-158	B1-BcII-48	2	12 198	1		B1
B1-BcII-159	B1-BcII-48	2	12 198	1		B1
B1-BcII-16	B1-BcII-48	2	12 198	1		B1
B1-BcII-160	B1-BcII-118	2	19 205	1		B1
B1-BcII-161	B1-BcII-118	2	12 198	1		B1
B1-BcII-162	B1-BcII-118	2	12 198	1		B1
B1-BcII-163	B1-BcII-118	2	12 198	1		B1
B1-BcII-164	B1-BcII-118	2	12 198	1		B1
B1-BcII-165	B1-BcII-118	2	12 198	1		B1
B1-BcII-166	B1-BcII-118	2	12 198	1		B1
B1-BcII-167	B1-BcII-118	2	12 198	1		B1
B1-BcII-168	B1-BcII-118	2	12 198	1		B1
B1-BcII-169	B1-BcII-118	2	12 198	1		B1
B1-BcII-17	B1-BcII-48	2	12 198	1		B1
B1-BcII-170	B1-BcII-118	2	12 198	1		B1
B1-BcII-171	B1-BcII-118	3	12 108 198	2		B1
B1-BcII-172	B1-BcII-118	1	197	1		B1
B1-BcII-173	B1-BcII-5	2	11 197	1		B1
B1-BcII-174	B1-BcII-5	2	11 197	1		B1
B1-BcII-175	B1-BcII-5	2	11 197	1		B1
B1-BcII-176	B1-BcII-5	2	11 197	1		B1
B1-BcII-177	B1-BcII-5	2	11 197	1		B1
B1-BcII-178	B1-BcII-48	2	11 197	1		B1
B1-BcII-179	B1-BcII-5	2	11 197	1		B1
B1-BcII-18	B1-BcII-48	2	12 198	1		B1
B1-BcII-180	B1-BcII-5	2	11 197	1		B1
B1-BcII-181	B1-BcII-5	2	11 197	1		B1
B1-BcII-182	B1-BcII-5	2	11 197	1		B1
B1-BcII-183	B1-BcII-5	2	11 197	1		B1
B1-BcII-184	B1-BcII-5	2	11 197	1		B1
B1-BcII-185	B1-BcII-5	2	11 197	1		B1
B1-BcII-186	B1-BcII-5	2	11 197	1		B1
B1-BcII-187	B1-BcII-48	2	11 197	1		B1
B1-BcII-188	B1-BcII-5	2	11 197	1		B1
B1-BcII-189	B1-BcII-5	2	11 197	1		B1
B1-BcII-19	B1-BcII-48	2	12 198	1		B1
B1-BcII-190	B1-BcII-5	2	11 197	1		B1
B1-BcII-191	B1-BcII-5	2	11 197	1		B1
B1-BcII-192	B1-BcII-5	2	11 197	1		B1
B1-BcII-193	B1-BcII-5	2	11 197	1		B1
B1-BcII-194	B1-BcII-5	2	11 197	1		B1
B1-BcII-195	B1-BcII-48	2	11 197	1		B1
B1-BcII-2	B1-BcII-5	2	11 197	1		B1
B1-BcII-20	B1-BcII-48	2	12 198	1		B1
B1-BcII-201	B1-BcII-48	2	11 197	1		B1
B1-BcII-21	B1-BcII-118	2	12 198	1		B1
B1-BcII-22	B1-BcII-118	2	19 205	1		B1
B1-BcII-23	B1-BcII-48	2	12 198	1		B1
B1-BcII-24	B1-BcII-48	2	12 198	1		B1
B1-BcII-25	B1-BcII-118	2	12 198	1		B1
B1-BcII-26	B1-BcII-118	2	12 198	1		B1
B1-BcII-27	B1-BcII-118	2	12 198	1		B1
B1-BcII-28	B1-BcII-48	2	11 197	1		B1
B1-BcII-29	B1-BcII-118	2	12 198	1		B1
B1-BcII-3	B1-BcII-118	2	12 198	1		B1
B1-BcII-30	B1-BcII-48	2	12 198	1		B1
B1-BcII-31	B1-BcII-118	2	12 198	1		B1
B1-BcII-32	B1-BcII-118	2	12 198	1		B1
B1-BcII-33	B1-BcII-48	2	12 198	1		B1
B1-BcII-34	B1-BcII-48	2	12 198	1		B1
B1-BcII-35	B1-BcII-48	2	12 198	1		B1
B1-BcII-36	B1-BcII-48	2	12 198	1		B1
B1-BcII-37	B1-BcII-48	2	12 198	1		B1
B1-BcII-38	B1-BcII-48	2	12 198	1		B1
B1-BcII-39	B1-BcII-48	2	19 205	1		B1
B1-BcII-4	B1-BcII-5	2	11 197	1		B1
B1-BcII-40	B1-BcII-48	2	12 198	1		B1
B1-BcII-41	B1-BcII-118	2	12 198	1		B1
B1-BcII-42	B1-BcII-48	2	12 198	1		B1
B1-BcII-43	B1-BcII-118	2	12 198	1		B1
B1-BcII-44	B1-BcII-48	2	11 197	1		B1
B1-BcII-45	B1-BcII-48	2	10 196	1		B1
B1-BcII-46	B1-BcII-48	2	12 198	1		B1
B1-BcII-47	B1-BcII-48	2	12 198	1		B1
B1-BcII-48	B1-BcII-48	2	19 205	1		B1
B1-BcII-49	B1-BcII-5	2	11 197	1		B1
B1-BcII-5	B1-BcII-5	3	11 62 197	2		B1
B1-BcII-50	B1-BcII-5	2	11 197	1		B1
B1-BcII-51	B1-BcII-5	2	11 197	1		B1
B1-BcII-52	B1-BcII-48	2	11 197	1		B1
B1-BcII-53	B1-BcII-48	2	11 197	1		B1
B1-BcII-54	B1-BcII-48	2	18 204	1		B1
B1-BcII-55	B1-BcII-48	2	11 197	1		B1
B1-BcII-56	B1-BcII-48	2	11 197	1		B1
B1-BcII-57	B1-BcII-48	2	11 197	1		B1
B1-BcII-58	B1-BcII-48	2	11 197	1		B1
B1-BcII-59	B1-BcII-48	2	11 197	1		B1
B1-BcII-6	B1-BcII-48	2	18 204	1		B1
B1-BcII-60	B1-BcII-48	2	11 197	1		B1
B1-BcII-61	B1-BcII-48	2	11 197	1		B1
B1-BcII-62	B1-BcII-48	2	11 197	1		B1
B1-BcII-63	B1-BcII-48	2	11 197	1		B1
B1-BcII-64	B1-BcII-48	2	12 198	1		B1
B1-BcII-65	B1-BcII-48	2	12 198	1		B1
B1-BcII-66	B1-BcII-118	2	12 198	1		B1
B1-BcII-67	B1-BcII-118	2	12 198	1		B1
B1-BcII-68	B1-BcII-118	2	12 198	1		B1
B1-BcII-69	B1-BcII-118	2	12 198	1		B1
B1-BcII-7	B1-BcII-48	2	12 198	1		B1
B1-BcII-70	B1-BcII-118	2	12 198	1		B1
B1-BcII-71	B1-BcII-48	2	11 197	1		B1
B1-BcII-72	B1-BcII-48	2	11 197	1		B1
B1-BcII-73	B1-BcII-48	2	11 197	1		B1
B1-BcII-74	B1-BcII-48	2	11 197	1		B1
B1-BcII-75	B1-BcII-118	2	12 198	1		B1
B1-BcII-76	B1-BcII-5	2	11 197	1		B1
B1-BcII-77	B1-BcII-118	2	12 198	1		B1
B1-BcII-78	B1-BcII-118	2	12 198	1		B1
B1-BcII-79	B1-BcII-48	2	12 198	1		B1
B1-BcII-8	B1-BcII-8	2	12 198	1		B1
B1-BcII-80	B1-BcII-48	3	12 108 198	2		B1
B1-BcII-81	B1-BcII-48	2	12 198	1		B1
B1-BcII-82	B1-BcII-48	2	12 198	1		B1
B1-BcII-83	B1-BcII-118	2	11 197	1		B1
B1-BcII-84	B1-BcII-118	2	12 198	1		B1
B1-BcII-85	B1-BcII-48	2	12 198	1		B1
B1-BcII-86	B1-BcII-48	2	11 197	1		B1
B1-BcII-87	B1-BcII-118	2	15 201	1		B1
B1-BcII-88	B1-BcII-118	2	12 198	1		B1
B1-BcII-89	B1-BcII-48	2	12 198	1		B1
B1-BcII-9	B1-BcII-9	2	12 198	1		B1
B1-BcII-90	B1-BcII-48	2	12 198	1		B1
B1-BcII-91	B1-BcII-48	2	11 197	1		B1
B1-BcII-92	B1-BcII-48	2	12 198	1		B1
B1-BcII-93	B1-BcII-118	2	12 198	1		B1
B1-BcII-94	B1-BcII-48	2	11 197	1		B1
B1-BcII-95	B1-BcII-48	2	12 198	1		B1
B1-BcII-96	B1-BcII-48	2	12 198	1		B1
B1-BcII-97	B1-BcII-48	2	19 205	1		B1
B1-BcII-98	B1-BcII-48	2	12 198	1		B1
B1-BcII-99	B1-BcII-48	2	12 198	1		B1
B1-BIM-1	B1-BIM-1	2	8 175	1		B1
B1-BlaB-1	B1-BlaB-31	2	69 180	2		B1
B1-BlaB-10	B1-BlaB-39	1	179	1		B1
B1-BlaB-11	B1-BlaB-31	2	69 180	2		B1
B1-BlaB-12	B1-BlaB-12	1	180	1		B1
B1-BlaB-13	B1-BlaB-12	1	180	1		B1
B1-BlaB-14	B1-BlaB-31	2	68 179	2		B1
B1-BlaB-15	B1-BlaB-39	1	180	1		B1
B1-BlaB-16	B1-BlaB-16	2	69 180	2		B1
B1-BlaB-17	B1-BlaB-31	2	69 180	2		B1
B1-BlaB-18	B1-BlaB-31	2	69 180	2		B1
B1-BlaB-19	B1-BlaB-12	1	180	1		B1
B1-BlaB-2	B1-BlaB-31	2	69 180	2		B1
B1-BlaB-20	B1-BlaB-31	2	69 180	2		B1
B1-BlaB-21	B1-BlaB-31	2	69 180	2		B1
B1-BlaB-22	B1-BlaB-39	1	180	1		B1
B1-BlaB-23	B1-BlaB-12	1	180	1		B1
B1-BlaB-24	B1-BlaB-39	1	180	1		B1
B1-BlaB-25	B1-BlaB-39	1	180	1		B1
B1-BlaB-26	B1-BlaB-39	1	180	1		B1
B1-BlaB-27	B1-BlaB-39	1	180	1		B1
B1-BlaB-28	B1-BlaB-39	1	180	1		B1
B1-BlaB-29	B1-BlaB-31	2	69 180	2		B1
B1-BlaB-3	B1-BlaB-12	1	180	1		B1
B1-BlaB-30	B1-BlaB-31	2	69 180	2		B1
B1-BlaB-31	B1-BlaB-31	2	69 180	2		B1
B1-BlaB-32	B1-BlaB-31	2	69 180	2		B1
B1-BlaB-33	B1-BlaB-31	2	69 180	2		B1
B1-BlaB-34	B1-BlaB-39	1	180	1		B1
B1-BlaB-35	B1-BlaB-12	1	180	1		B1
B1-BlaB-36	B1-BlaB-39	1	180	1		B1
B1-BlaB-38	B1-BlaB-16	2	69 180	2		B1
B1-BlaB-39	B1-BlaB-39	1	180	1		B1
B1-BlaB-4	B1-BlaB-31	2	69 180	2		B1
B1-BlaB-5	B1-BlaB-39	1	180	1		B1
B1-BlaB-6	B1-BlaB-39	1	180	1		B1
B1-BlaB-7	B1-BlaB-39	1	179	1		B1
B1-BlaB-8	B1-BlaB-39	1	179	1		B1
B1-BlaB-9	B1-BlaB-39	1	179	1		B1
B1-CAM-1	B1-CAM-1	1	177	1		B1
B1-CfiA	B1-CfiA-21	3	104 155 181	3		B1
B1-CfiA-10	B1-CfiA-21	3	104 155 181	3		B1
B1-CfiA-14	B1-CfiA-21	3	104 155 181	3		B1
B1-CfiA-17	B1-CfiA-21	3	104 155 181	3		B1
B1-CfiA-18	B1-CfiA-21	3	104 155 181	3		B1
B1-CfiA-19	B1-CfiA-21	3	104 155 181	3		B1
B1-CfiA-2	B1-CfiA-21	3	104 155 181	3		B1
B1-CfiA-20	B1-CfiA-21	3	104 155 181	3		B1
B1-CfiA-21	B1-CfiA-21	3	104 155 181	3		B1
B1-CfiA-22	B1-CfiA-21	3	104 155 181	3		B1
B1-CfiA-23	B1-CfiA-21	3	104 155 181	3		B1
B1-CfiA-24	B1-CfiA-21	3	104 155 181	3		B1
B1-CfiA-26	B1-CfiA-21	3	104 155 181	3		B1
B1-CfiA-27	B1-CfiA-21	3	104 155 181	3		B1
B1-CfiA-28	B1-CfiA-21	3	104 155 181	3		B1
B1-CfiA-4	B1-CfiA-21	3	104 155 181	3		B1
B1-CfiA-8	B1-CfiA-21	3	104 155 181	3		B1
B1-CfiA-9	B1-CfiA-21	3	104 155 181	3		B1
B1-CfiA-T1	B1-CfiA-21	3	104 155 181	3		B1
B1-CGB-1	B1-CGB-1	1	181	1		B1
B1-CX1-1	B1-CX1-1	4	17 60 110 187	3		B1
B1-DIM-1	B1-DIM-1	1	176	1		B1
B1-EBR-1	B1-EBR-2	1	174	1		B1
B1-EBR-2	B1-EBR-2	1	174	1		B1
B1-EBR-3	B1-EBR-2	1	174	1		B1
B1-EBR-4	B1-EBR-2	1	174	1		B1
B1-ECV-1	B1-ECV-1	4	17 73 122 199	3		B1
B1-ElBla2-1	B1-ElBla2-1	2	17 200	1		B1
B1-FIA-1	B1-FIA-1	2	97 183	2		B1
B1-FIM-1	B1-FIM-1	2	15 195	1		B1
B1-GIM-1	B1-GIM-1	1	175	1		B1
B1-GIM-2	B1-GIM-1	1	175	1		B1
B1-GMB-1	B1-GMB-1	1	204	1		B1
B1-GRD23-1	B1-GRD23-1	1	177	1		B1
B1-HBA-1	B1-HBA-1	2	20 199	1		B1
B1-HMB-1	B1-HMB-1	1	178	1		B1
B1-IMP-1	B1-IMP-42	2	13 176	1		B1
B1-IMP-10	B1-IMP-42	2	13 176	1		B1
B1-IMP-11	B1-IMP-22	3	8 13 176	1		B1
B1-IMP-12	B1-IMP-12	2	8 176	1		B1
B1-IMP-13	B1-IMP-37	4	8 10 13 176	1		B1
B1-IMP-14	B1-IMP-54	3	8 13 176	1		B1
B1-IMP-15	B1-IMP-15	2	13 176	1		B1
B1-IMP-16	B1-IMP-22	3	8 13 176	1		B1
B1-IMP-17	B1-IMP-37	4	8 10 13 176	1		B1
B1-IMP-18	B1-IMP-75	3	8 13 176	1		B1
B1-IMP-19	B1-IMP-37	4	8 10 13 176	1		B1
B1-IMP-2	B1-IMP-37	4	8 10 13 176	1		B1
B1-IMP-20	B1-IMP-37	4	8 10 13 176	1		B1
B1-IMP-21	B1-IMP-22	3	8 13 176	1		B1
B1-IMP-22	B1-IMP-22	3	8 13 176	1		B1
B1-IMP-23	B1-IMP-37	4	8 10 13 176	1		B1
B1-IMP-24	B1-IMP-37	4	8 10 13 176	1		B1
B1-IMP-25	B1-IMP-42	2	13 176	1		B1
B1-IMP-26	B1-IMP-42	2	13 176	1		B1
B1-IMP-27	B1-IMP-64	3	8 13 176	1		B1
B1-IMP-28	B1-IMP-42	2	13 176	1		B1
B1-IMP-29	B1-IMP-22	2	13 176	1		B1
B1-IMP-3	B1-IMP-42	2	13 176	1		B1
B1-IMP-30	B1-IMP-42	2	13 176	1		B1
B1-IMP-31	B1-IMP-35	2	13 176	1		B1
B1-IMP-32	B1-IMP-54	3	8 13 176	1		B1
B1-IMP-33	B1-IMP-37	4	8 10 13 176	1		B1
B1-IMP-34	B1-IMP-42	2	13 176	1		B1
B1-IMP-35	B1-IMP-35	2	13 176	1		B1
B1-IMP-37	B1-IMP-37	4	8 10 13 176	1		B1
B1-IMP-38	B1-IMP-42	2	13 176	1		B1
B1-IMP-39	B1-IMP-37	4	8 10 13 176	1		B1
B1-IMP-4	B1-IMP-42	2	13 176	1		B1
B1-IMP-40	B1-IMP-42	2	13 176	1		B1
B1-IMP-41	B1-IMP-22	3	8 13 176	1		B1
B1-IMP-42	B1-IMP-42	2	13 176	1		B1
B1-IMP-43	B1-IMP-15	2	13 176	1		B1
B1-IMP-44	B1-IMP-22	3	8 13 176	1		B1
B1-IMP-45	B1-IMP-53	2	13 176	1		B1
B1-IMP-46	B1-IMP-54	3	8 13 176	1		B1
B1-IMP-48	B1-IMP-54	3	8 13 176	1		B1
B1-IMP-49	B1-IMP-75	3	8 13 176	1		B1
B1-IMP-5	B1-IMP-15	2	13 176	1		B1
B1-IMP-51	B1-IMP-15	2	13 176	1		B1
B1-IMP-52	B1-IMP-42	2	13 176	1		B1
B1-IMP-53	B1-IMP-53	2	13 176	1		B1
B1-IMP-54	B1-IMP-54	3	8 13 176	1		B1
B1-IMP-55	B1-IMP-42	2	13 176	1		B1
B1-IMP-56	B1-IMP-75	3	8 13 176	1		B1
B1-IMP-58	B1-IMP-22	3	8 13 176	1		B1
B1-IMP-59	B1-IMP-42	2	13 176	1		B1
B1-IMP-6	B1-IMP-42	2	13 176	1		B1
B1-IMP-60	B1-IMP-42	2	13 176	1		B1
B1-IMP-61	B1-IMP-42	2	13 176	1		B1
B1-IMP-62	B1-IMP-15	2	13 176	1		B1
B1-IMP-63	B1-IMP-12	2	8 176	1		B1
B1-IMP-64	B1-IMP-64	3	8 13 176	1		B1
B1-IMP-65	B1-IMP-54	3	8 13 176	1		B1
B1-IMP-66	B1-IMP-42	2	13 176	1		B1
B1-IMP-67	B1-IMP-64	3	8 13 176	1		B1
B1-IMP-68	B1-IMP-22	3	8 13 176	1		B1
B1-IMP-69	B1-IMP-37	4	8 10 13 176	1		B1
B1-IMP-7	B1-IMP-42	2	13 176	1		B1
B1-IMP-70	B1-IMP-42	2	13 176	1		B1
B1-IMP-71	B1-IMP-75	3	8 13 176	1		B1
B1-IMP-73	B1-IMP-15	2	13 176	1		B1
B1-IMP-74	B1-IMP-22	3	8 13 176	1		B1
B1-IMP-75	B1-IMP-75	3	8 13 176	1		B1
B1-IMP-76	B1-IMP-42	2	13 176	1		B1
B1-IMP-77	B1-IMP-42	2	13 176	1		B1
B1-IMP-78	B1-IMP-42	2	13 176	1		B1
B1-IMP-79	B1-IMP-42	2	13 176	1		B1
B1-IMP-8	B1-IMP-37	4	8 10 13 176	1		B1
B1-IMP-80	B1-IMP-42	2	13 176	1		B1
B1-IMP-81	B1-IMP-15	3	8 13 176	1		B1
B1-IMP-82	B1-IMP-53	2	13 176	1		B1
B1-IMP-83	B1-IMP-75	3	8 13 176	1		B1
B1-IMP-84	B1-IMP-37	4	8 10 13 176	1		B1
B1-IMP-85	B1-IMP-15	2	13 176	1		B1
B1-IMP-88	B1-IMP-42	2	13 176	1		B1
B1-IMP-89	B1-IMP-42	2	13 176	1		B1
B1-IMP-9	B1-IMP-53	2	13 176	1		B1
B1-IMP-90	B1-IMP-12	2	8 176	1		B1
B1-IND-1	B1-IND-16	1	178	1		B1
B1-IND-10	B1-IND-16	1	178	1		B1
B1-IND-11	B1-IND-13	1	178	1		B1
B1-IND-12	B1-IND-13	1	178	1		B1
B1-IND-13	B1-IND-13	1	178	1		B1
B1-IND-14	B1-IND-14	1	178	1		B1
B1-IND-15	B1-IND-13	1	178	1		B1
B1-IND-16	B1-IND-16	1	178	1		B1
B1-IND-2	B1-IND-13	1	178	1		B1
B1-IND-2a	B1-IND-13	1	178	1		B1
B1-IND-3	B1-IND-14	1	178	1		B1
B1-IND-4	B1-IND-4	1	179	1		B1
B1-IND-5	B1-IND-16	1	178	1		B1
B1-IND-6	B1-IND-6	1	178	1		B1
B1-IND-7	B1-IND-16	1	178	1		B1
B1-IND-8	B1-IND-16	1	178	1		B1
B1-IND-9	B1-IND-9	1	178	1		B1
B1-JOHN-1	B1-JOHN-1	1	178	1		B1
B1-KHM-1	B1-KHM-1	2	19 178	1		B1
B1-MOC-1	B1-MOC-1	1	176	1		B1
B1-MUS-1	B1-MUS-1	2	13 176	1		B1
B1-MUS-2	B1-MUS-1	2	13 176	1		B1
B1-MYO-1	B1-MYO-1	4	18 79 129 208	3		B1
B1-MYX-1	B1-MYX-1	3	10 22 202	1		B1
B1-NDM-1	B1-NDM-18	2	26 208	1		B1
B1-NDM-10	B1-NDM-18	2	26 208	1		B1
B1-NDM-11	B1-NDM-18	2	26 208	1		B1
B1-NDM-12	B1-NDM-18	2	26 208	1		B1
B1-NDM-13	B1-NDM-18	2	26 208	1		B1
B1-NDM-14	B1-NDM-18	2	26 208	1		B1
B1-NDM-15	B1-NDM-18	2	26 208	1		B1
B1-NDM-16	B1-NDM-18	2	26 208	1		B1
B1-NDM-16b	B1-NDM-18	2	26 208	1		B1
B1-NDM-17	B1-NDM-18	2	26 208	1		B1
B1-NDM-18	B1-NDM-18	2	26 213	1		B1
B1-NDM-19	B1-NDM-18	2	26 208	1		B1
B1-NDM-2	B1-NDM-18	2	26 208	1		B1
B1-NDM-20	B1-NDM-18	2	26 208	1		B1
B1-NDM-21	B1-NDM-18	2	26 208	1		B1
B1-NDM-22	B1-NDM-18	2	26 208	1		B1
B1-NDM-23	B1-NDM-18	2	26 208	1		B1
B1-NDM-24	B1-NDM-18	2	26 208	1		B1
B1-NDM-25	B1-NDM-18	2	26 208	1		B1
B1-NDM-26	B1-NDM-18	2	26 208	1		B1
B1-NDM-27	B1-NDM-18	2	26 208	1		B1
B1-NDM-28	B1-NDM-18	2	26 208	1		B1
B1-NDM-29	B1-NDM-18	2	26 208	1		B1
B1-NDM-3	B1-NDM-18	2	26 208	1		B1
B1-NDM-30	B1-NDM-18	2	26 208	1		B1
B1-NDM-31	B1-NDM-18	2	26 208	1		B1
B1-NDM-4	B1-NDM-18	2	26 208	1		B1
B1-NDM-5	B1-NDM-18	2	26 208	1		B1
B1-NDM-6	B1-NDM-18	2	26 208	1		B1
B1-NDM-7	B1-NDM-18	2	26 208	1		B1
B1-NDM-8	B1-NDM-18	2	26 208	1		B1
B1-NDM-9	B1-NDM-18	2	26 208	1		B1
B1-ORR-1	B1-ORR-1	4	14 22 68 196	2		B1
B1-PAN-1	B1-PAN-1	1	206	1		B1
B1-PEDO-3	B1-PEDO-3	2	10 175	1		B1
B1-PKB-1	B1-PKB-1	3	10 93 179	2		B1
B1-PST-1	B1-PST-1	2	14 177	1		B1
B1-PST-2	B1-PST-1	2	14 177	1		B1
B1-SFB-1	B1-SFB-1	1	184	1		B1
B1-SHD-1	B1-SHD-1	1	201	1		B1
B1-SHN-1	B1-SHN-1	2	6 175	1		B1
B1-SIM-1	B1-SIM-2	2	8 176	1		B1
B1-SIM-2	B1-SIM-2	2	8 176	1		B1
B1-SLB-1	B1-SLB-1	1	180	1		B1
B1-SPM-1	B1-SPM-1	2	17 214	1		B1
B1-SPN79-1	B1-SPN79-1	2	25 211	1		B1
B1-SPS-1	B1-SPS-1	2	221 252	2		B1
B1-STA-1	B1-STA-1	3	12 28 198	1		B1
B1-TMB-1	B1-TMB-1	1	175	1		B1
B1-TMB-2	B1-TMB-1	1	175	1		B1
B1-TTU-1	B1-TTU-1	2	17 176	1		B1
B1-TUS-1	B1-TUS-1	1	176	1		B1
B1-VAM-1	B1-VAM-1	1	180	1		B1
B1-VIM-1	B1-VIM-5	1	198	1		B1
B1-VIM-10	B1-VIM-8	1	198	1		B1
B1-VIM-11	B1-VIM-8	1	198	1		B1
B1-VIM-12	B1-VIM-5	1	198	1		B1
B1-VIM-13	B1-VIM-5	1	198	1		B1
B1-VIM-14	B1-VIM-5	1	198	1		B1
B1-VIM-15	B1-VIM-8	1	198	1		B1
B1-VIM-16	B1-VIM-8	1	198	1		B1
B1-VIM-17	B1-VIM-8	1	198	1		B1
B1-VIM-18	B1-VIM-8	1	194	1		B1
B1-VIM-19	B1-VIM-5	1	198	1		B1
B1-VIM-2	B1-VIM-8	1	198	1		B1
B1-VIM-20	B1-VIM-8	1	198	1		B1
B1-VIM-23	B1-VIM-8	1	198	1		B1
B1-VIM-24	B1-VIM-8	1	198	1		B1
B1-VIM-25	B1-VIM-5	1	198	1		B1
B1-VIM-26	B1-VIM-5	1	198	1		B1
B1-VIM-27	B1-VIM-5	1	198	1		B1
B1-VIM-28	B1-VIM-5	1	198	1		B1
B1-VIM-29	B1-VIM-5	1	198	1		B1
B1-VIM-3	B1-VIM-8	1	198	1		B1
B1-VIM-30	B1-VIM-8	1	198	1		B1
B1-VIM-31	B1-VIM-8	1	198	1		B1
B1-VIM-32	B1-VIM-5	1	198	1		B1
B1-VIM-33	B1-VIM-5	1	198	1		B1
B1-VIM-34	B1-VIM-5	1	198	1		B1
B1-VIM-35	B1-VIM-5	1	198	1		B1
B1-VIM-36	B1-VIM-8	1	198	1		B1
B1-VIM-37	B1-VIM-5	1	198	1		B1
B1-VIM-38	B1-VIM-5	1	198	1		B1
B1-VIM-39	B1-VIM-5	1	198	1		B1
B1-VIM-4	B1-VIM-5	1	198	1		B1
B1-VIM-40	B1-VIM-5	1	198	1		B1
B1-VIM-41	B1-VIM-8	1	198	1		B1
B1-VIM-42	B1-VIM-8	1	198	1		B1
B1-VIM-43	B1-VIM-5	1	198	1		B1
B1-VIM-44	B1-VIM-8	1	198	1		B1
B1-VIM-45	B1-VIM-8	1	198	1		B1
B1-VIM-46	B1-VIM-8	1	198	1		B1
B1-VIM-47	B1-VIM-5	1	198	1		B1
B1-VIM-48	B1-VIM-8	1	198	1		B1
B1-VIM-49	B1-VIM-5	1	198	1		B1
B1-VIM-5	B1-VIM-5	1	198	1		B1
B1-VIM-50	B1-VIM-8	1	198	1		B1
B1-VIM-51	B1-VIM-8	1	198	1		B1
B1-VIM-52	B1-VIM-5	1	198	1		B1
B1-VIM-53	B1-VIM-8	1	198	1		B1
B1-VIM-54	B1-VIM-5	1	198	1		B1
B1-VIM-55	B1-VIM-5	1	198	1		B1
B1-VIM-56	B1-VIM-8	1	198	1		B1
B1-VIM-57	B1-VIM-5	1	198	1		B1
B1-VIM-58	B1-VIM-8	1	198	1		B1
B1-VIM-59	B1-VIM-5	1	198	1		B1
B1-VIM-6	B1-VIM-8	1	198	1		B1
B1-VIM-60	B1-VIM-8	1	198	1		B1
B1-VIM-61	B1-VIM-69	1	197	1		B1
B1-VIM-62	B1-VIM-8	1	198	1		B1
B1-VIM-63	B1-VIM-8	1	198	1		B1
B1-VIM-64	B1-VIM-5	1	198	1		B1
B1-VIM-65	B1-VIM-8	1	198	1		B1
B1-VIM-66	B1-VIM-8	1	198	1		B1
B1-VIM-67	B1-VIM-8	1	198	1		B1
B1-VIM-68	B1-VIM-5	1	198	1		B1
B1-VIM-69	B1-VIM-69	1	197	1		B1
B1-VIM-7	B1-VIM-69	1	197	1		B1
B1-VIM-70	B1-VIM-5	1	198	1		B1
B1-VIM-71	B1-VIM-5	1	198	1		B1
B1-VIM-72	B1-VIM-8	1	198	1		B1
B1-VIM-73	B1-VIM-8	1	198	1		B1
B1-VIM-74	B1-VIM-8	1	198	1		B1
B1-VIM-8	B1-VIM-8	1	198	1		B1
B1-VIM-9	B1-VIM-8	1	198	1		B1
B1-VMB-1	B1-VMB-1	1	176	1		B1
B1-ZHO-1	B1-ZHO-1	1	180	1		B1
B1-ZHO-2	B1-ZHO-1	1	177	1		B1
B1-ZOG-1	B1-ZOG-1	4	19 59 109 186	3		B1
B2-CphA-1	B2-CphA-11	2	8 193	1		B2
B2-CphA-10	B2-CphA-11	2	8 193	1		B2
B2-CphA-11	B2-CphA-11	2	8 194	1		B2
B2-CphA-12	B2-CphA-11	2	8 193	1		B2
B2-CphA-13	B2-CphA-11	2	8 193	1		B2
B2-CphA-14	B2-CphA-11	2	8 193	1		B2
B2-CphA-15	B2-CphA-11	2	8 193	1		B2
B2-CphA-16	B2-CphA-11	2	8 193	1		B2
B2-CphA-17	B2-CphA-11	2	8 193	1		B2
B2-CphA-2	B2-CphA-11	2	8 193	1		B2
B2-CphA-3	B2-CphA-11	1	193	1		B2
B2-CphA-4	B2-CphA-11	2	8 193	1		B2
B2-CphA-5	B2-CphA-11	2	8 193	1		B2
B2-CphA-6	B2-CphA-11	2	8 193	1		B2
B2-CphA-7	B2-CphA-11	2	8 193	1		B2
B2-CphA-8	B2-CphA-11	2	8 193	1		B2
B2-CphA-9	B2-CphA-11	2	8 193	1		B2
B2-CVI-1	B2-CVI-1	2	19 188	1		B2
B2-PFM-1	B2-PFM-2	3	14 17 189	1		B2
B2-PFM-2	B2-PFM-2	2	14 189	1		B2
B2-PFM-3	B2-PFM-2	2	14 189	1		B2
B2-SFH-1	B2-SFH-1	2	19 191	1		B2
B2-YEM-1	B2-YEM-1	1	186	1		B2
B3-AIM-1	B3-AIM-1	6	31 56 194 199 243 274	6		B3
B3-ALG11-1	B3-ALG11-1	4	188 193 237 271	4		B3
B3-ALG11-2	B3-ALG11-2	4	185 190 234 268	4		B3
B3-ALG11-3	B3-ALG11-3	4	186 191 235 269	4		B3
B3-ALG11-4	B3-ALG11-3	4	186 191 235 269	4		B3
B3-ALG6-1	B3-ALG6-1	7	7 46 49 211 216 260 293	6		B3
B3-AM1-1	B3-AM1-1	2	193 213	2		B3
B3-BJP-1	B3-BJP-49	3	9 181 201	2		B3
B3-BJP-10	B3-BJP-11	3	9 181 201	2		B3
B3-BJP-11	B3-BJP-11	3	9 181 201	2		B3
B3-BJP-12	B3-BJP-11	3	9 181 201	2		B3
B3-BJP-13	B3-BJP-11	3	9 181 201	2		B3
B3-BJP-14	B3-BJP-14	3	9 181 201	2		B3
B3-BJP-15	B3-BJP-15	3	9 181 201	2		B3
B3-BJP-16	B3-BJP-16	3	9 181 201	2		B3
B3-BJP-17	B3-BJP-16	3	9 181 201	2		B3
B3-BJP-18	B3-BJP-16	3	9 181 201	2		B3
B3-BJP-19	B3-BJP-19	3	9 181 201	2		B3
B3-BJP-2	B3-BJP-11	3	9 181 201	2		B3
B3-BJP-20	B3-BJP-19	3	9 181 201	2		B3
B3-BJP-21	B3-BJP-24	3	9 181 201	2		B3
B3-BJP-22	B3-BJP-24	3	9 181 201	2		B3
[truncated: 4,653 more rows]
